# Supplementary material for: Silver-catalyzed [2,3]-rearrangement of halonium ylides derived from allyl and propargyl halides and alkyl diazoacetates
Source: Royal Society of Chemistry journal article supplement (doi:10.1039/b608266a), 2007-01-01
Supplement: b608266a.pdf [file b608266a.pdf]

**Experimental:**

Commercial reagents were used as received unless stated otherwise. The catalyst **1** was prepared according to published procedures.<sup>1,2</sup> <sup>1</sup>H NMR (300 or 500 MHz) and <sup>13</sup>C NMR (75 or 125 MHz) spectra were recorded in CDCl<sub>3</sub> on JEOL (Eclipse-500 and ECX-300 respectively) instruments. High resolution electrospray mass spectra were obtained at the University of Florida using an APEX II instrument (Bruker Daltonics, Billerica, MA).

**Ethyl 2-bromo-4-pentenoate (15a)**<sup>3</sup>

EDA (114 mg, 2.00 mmol) in allyl bromide 1.5 mL was added by automatic syringe over 1 h to a stirred solution of the catalyst (40 mg, 0.050 mmol) in the allyl bromide (1.5 mL) under nitrogen in a flask shielded from light. The resulting solution was stirred 24 h at ambient temperature under nitrogen. The solution was concentrated and the residue was purified by flash chromatography (SiO<sub>2</sub>, 98:3 pentane/ether), yielding the product as a colorless oil (147 mg, 75%).

<sup>1</sup>H NMR (500 MHz):  $\delta$  = 1.29 (t,  $J$  = 7.1 Hz, 3H), 2.76-2.69 (m, 1H), 2.89-2.83 (m, 1H), 4.22 (t,  $J$  = 7.4 Hz, 1H), 4.24 (q,  $J$  = 7.1 Hz, 2H), 5.20-5.13 (m, 2H), 5.80-5.71 (m, 1H)

***t*-Butyl 2-bromo-4-pentenoate (15b)**<sup>3</sup>

*tert*-Butyl diazoacetate (200 mg, 1.41 mmol) in the allyl bromide (1.5 mL) was added by automatic syringe over 1 h to a stirred solution of the catalyst (30 mg, 0.038 mmol) in the allyl bromide (1.5 mL) under nitrogen in a flask shielded from light. The resulting solution was stirred 24 h at ambient temperature under nitrogen. The solution was concentrated and the residue was purified by flash chromatography (SiO<sub>2</sub>, 98:2 pentane/ether), yielding the product (215 mg, 65% yield) as a colorless oil.

IR (neat) cm<sup>-1</sup> = 2980, 1735, 1641, 1456.

<sup>1</sup>H NMR (500 MHz):  $\delta$  = 1.46 (s, 9H), 2.64-2.69 (m, 1H), 2.78-2.84 (m, 1H), 4.12 (t,  $J$  = 7.0 Hz, 1H), 5.13-5.18 (m, 2H), 5.70-5.79 (m, 1H).

<sup>13</sup>C NMR (125 MHz):  $\delta$  = 28.2, 39.6, 46.5, 82.9, 119.3, 133.7, 168.8.

**Ethyl 2-chloro-3-methyl-4-pentenoate (16a)**<sup>4</sup>

Ethyl diazoacetate (218 mg, 2.00 mmol) in the crotyl chloride (1.5 mL) was added by automatic syringe over 1 h to a stirred solution of the catalyst (40 mg, 0.050 mmol) in the crotyl chloride (1.5 mL) under nitrogen in a flask shielded from light. The resulting solution was stirred 24 h at ambient temperature under nitrogen. The solution was concentrated and the residue was purified by flash chromatography (SiO<sub>2</sub>, 98:6 pentane/ether), yielding the product (290 mg, 86% yield) as a colorless oil.

IR (neat) cm<sup>-1</sup> = 2982, 1748, 1642, 1457.

<sup>1</sup>H NMR (500 MHz):  $\delta$  = 1.15 (d,  $J$  = 6.7 Hz, 1.5H), 1.16 (d,  $J$  = 6.7 Hz, 1.5H), 1.28 (t,  $J$  = 7.2 Hz, 1.5H), 1.30 (t,  $J$  = 7.2 Hz, 1.5H), 2.82-2.90 (m, 1H), 4.26-4.15 (m, 3H), 5.17-5.11 (m, 2H), 5.87-5.72 (m, 1H), *syn/anti* ratio = 1/1.

---

1. Dias, H. V. R.; Jin, W. *Inorg. Chem.* **1996**, *35*, 267-268.

2. Dias, H. V. R.; Wang, Z.; Jin, W. *Inorg. Chem.* **1997**, *36*, 6205-6215.

3. Stotter, P.L.; Hill, K.A. *Tetrahedron Lett.* **1972**, *40*, 4067-4074.

4. Doyle, M.P.; Tamblyn, W.H.; Bagheri, V. *J. Org. Chem.* **1981**, *46*, 5094-5102

$^{13}\text{C}$  NMR (125 MHz):  $\delta$  = 14.13, 14.17, 16.0, 17.3, 42.00, 42.04, 61.9, 62.0, 62.1, 62.3, 116.82, 116.89, 137.7, 138.3, 168.8, 168.9.

#### ***t*-Butyl 2-chloro-3-methyl-4-pentenoate (16b)**

*tert*-Butyl diazoacetate (166 mg, 1.17 mmol) in the crotyl chloride (1.5 mL) was added by automatic syringe over 1 h to a stirred solution of the catalyst (30 mg, 0.038 mmol) in the crotyl chloride (1.5 mL) under nitrogen in a flask shielded from light. The resulting solution was stirred 24 h at ambient temperature under nitrogen. The solution was concentrated and the residue was purified by flash chromatography ( $\text{SiO}_2$ , 98:6 pentane/ether), yielding the product (230 mg, 96% yield) as a colorless oil.

IR (neat,  $\text{cm}^{-1}$ ): = 2980, 1744, 1643, 1457.

$^1\text{H}$  NMR (500 MHz):  $\delta$  = 1.12, 1.4 (d,  $J$  = 2.0 Hz, 3H), 1.46, 1.45 (s, 9H), 2.79 (m, 1H), 4.04, 4.07 (d,  $J$  = 6.5 Hz, 1H), 5.08-5.11 (m, 2H), 5.72-5.77 (m, 1H).

$^{13}\text{C}$  NMR (125 MHz):  $\delta$  = 16.0, 17.4, 27.92, 27.96, 42.00, 42.04, 63.1, 63.3, 82.6, 82.7, 116.6, 116.7, 137.9, 138.5, 167.8, 167.9.

#### **Ethyl 2-chloro-4-methyl-4-pentenoate (17a)**

Ethyl diazoacetate (218 mg, 2.00 mmol) in the 3-chloro-2-methylpropene (1.5 mL) was added by automatic syringe over 1 h to a stirred solution of the catalyst (40 mg, 0.050 mmol) in the 3-chloro-2-methylpropene (1.5 mL) under nitrogen in a flask shielded from light. The resulting solution was stirred 24 h at ambient temperature under nitrogen. The solution was concentrated and the residue was purified by flash chromatography ( $\text{SiO}_2$ , 98:3 pentane/Ether), yielding the product (200 mg, 59% yield) as a colorless oil.

IR (neat,  $\text{cm}^{-1}$ ): = 2981, 2358, 1727, 1446, 1383.

$^1\text{H}$  NMR (300 MHz):  $\delta$  = 1.29 (m, 3H), 1.75 (s, 3H), 2.57 (dd,  $J$  = 3.0, 16.5 Hz, 1H), 2.75 (dd,  $J$  = 3.0, 16.5 Hz, 1H), 4.22 (m, 2H), 4.38 (m, 1H), 4.80 (s, 1H), 4.88 (s, 1H).

$^{13}\text{C}$  NMR (75 MHz):  $\delta$  = 14.1, 22.1, 42.9, 55.0, 62.1, 114.4, 139.9, 169.5.

HRMS (ESI): calcd for  $\text{C}_8\text{H}_{14}\text{ClO}_2$  ( $\text{M}+\text{H}$ ) $^+$  177.0678, found 177.0674.

#### ***t*-Butyl 2-chloro-4-methyl-4-pentenoate (17b)**

*tert*-Butyl diazoacetate (165 mg, 1.16 mmol) in the 3-chloro-2-methylpropene (1.5 mL) was added by automatic syringe over 1 h to a stirred solution of the catalyst (30 mg, 0.038 mmol) in 3-chloro-2-methylpropene (1.5 mL) under nitrogen in a flask shielded from light. The resulting solution was stirred 24 h at ambient temperature under nitrogen. The solution was concentrated and the residue was purified by flash chromatography ( $\text{SiO}_2$ , 98:3 pentane/ether), yielding the product (200 mg, 84% yield) as a colorless oil.

IR (neat,  $\text{cm}^{-1}$ ) = 2982, 1744, 1652, 1455, 1395.

$^1\text{H}$  NMR (500 MHz):  $\delta$  = 1.45 (s, 9H), 1.74 (s, 3H), 2.52 (dd,  $J$  = 7.3, 14.7 Hz, 1H), 2.71 (dd,  $J$  = 7.3 and 14.7 Hz, 1H), 4.25 (t,  $J$  = 7.3 Hz, 1H), 4.78 (s, 1H), 4.85 (s, 1H).

$^{13}\text{C}$  NMR (125 MHz):  $\delta$  = 22.1, 27.8, 43.0, 56.0, 82.6, 114.2, 140.2, 168.5.

HRMS (ESI): calcd for  $\text{C}_{10}\text{H}_{18}\text{ClO}_2$  ( $\text{M}+\text{H}$ ) $^+$  205.0990, found 205.0989.

#### **Ethyl 2-bromo-4-methyl-4-pentenoate (18a)**

Ethyl diazoacetate (218 mg, 2.00 mmol) in the 3-bromo-2-methylpropene (1.5 mL) was added by automatic syringe over 1 h to a stirred solution of the catalyst (40 mg, 0.050 mmol) in the 3-bromo-2-methylpropene (1.5 mL) under nitrogen in a flask shielded from light. The resulting solution was stirred 24 h at ambient temperature under nitrogen. The

solution was concentrated and the residue was purified by flash chromatography (SiO<sub>2</sub>, 97:3 pentane/ether), yielding the product (240 mg, 57% yield) as a colorless oil.

IR (neat, cm<sup>-1</sup>): = 2925, 2854, 1741, 1457.

<sup>1</sup>H NMR (300 MHz): δ = 1.29 (t, *J* = 7.2 Hz, 3H), 1.74 (s, 3H), 2.65 (dd, *J* = 7.2, 15.0 Hz, 1H), 2.85 (dd, *J* = 8.1, 14.7 Hz, 1H), 4.22 (q, *J* = 7.2 Hz, 2H), 4.34 (dd, *J* = 7.2, 8.4 Hz, 1H), 4.78 (s, 1H), 4.88 (s, 1H).

<sup>13</sup>C NMR (75 MHz) δ = 14.0, 22.2, 42.8, 43.6, 62.0, 114.1, 140.8, 169.6.

HRMS (ESI): calcd for C<sub>8</sub>H<sub>14</sub>BrO<sub>2</sub> (M+H)<sup>+</sup> 221.0172, found 221.0174.

#### ***t*-Butyl 2-bromo-4-methyl-4-pentenoate (18b)**

*tert*-Butyl diazoacetate (166 mg, 1.17 mmol) in the 3-bromo-2-methylpropene (1.5 mL) was added by automatic syringe over 1 h to a stirred solution of the catalyst (30 mg, 0.038 mmol) in the 3-bromo-2-methylpropene (1.5 mL) under nitrogen in a flask shielded from light. The resulting solution was stirred 24 h at ambient temperature under nitrogen. The solution was concentrated and the residue was purified by flash chromatography (SiO<sub>2</sub>, 97:3 pentane/ether), yielding the product (260 mg, 89% yield) as a colorless oil.

IR (neat, cm<sup>-1</sup>): = 3081, 2980, 1743, 1651, 1455, 1394.

<sup>1</sup>H NMR (500 MHz): δ = 1.48 (s, 9H), 1.77 (s, 3H), 2.55 (dd, *J* = 7.5, 14.5 Hz, 1H), 2.74 (dd, *J* = 7.5, 14.5 Hz, 1H), 4.28 (t, *J* = 8.0 Hz, 1H), 4.81 (s, 1H), 4.88 (s, 1H).

<sup>13</sup>C NMR (125 MHz): δ = 22.2, 27.9, 43.1, 56.1, 82.6, 114.3, 140.2, 168.5.

#### **Ethyl 2-bromo-3-bromomethyl-4-pentenoate (19a)**

Ethyl diazoacetate (218 mg, 2.00 mmol) and 1,4-dibromo-2-butene (1.00 g), dissolved in dichloromethane (1 mL) was added by automatic syringe over 1 h to a stirred solution of the catalyst (40 mg, 0.050 mmol) and 1,4-dibromo-2-butene (1.00 g) in dichloromethane (1 mL) under nitrogen in a flask shielded from light. The resulting solution was stirred 24 h at ambient temperature under nitrogen. The solution was concentrated and the residue was purified by flash chromatography (SiO<sub>2</sub>, 98:3 pentane/ether), yielding the product as a colorless oil (400 mg, 70% yield).

IR (neat, cm<sup>-1</sup>): = 2983, 2359, 1740, 1370.

<sup>1</sup>H NMR (300 MHz): δ = 1.25-1.27 (m, 3H), 2.98-3.01 (m, 1H), 3.48-3.49 (m, 1H), 3.61-3.66, 3.72-3.78 (m, 1H), 4.14-4.25 (m, 2H), 4.30, 4.70 (dd, *J* = 3.0, 16.5 Hz, 1H), 5.26-5.27 (m, 2H), 5.71-5.74 (m, 1H), *syn/anti* ratio = 1/1.

<sup>13</sup>C NMR (75 MHz): δ = 14.0, 14.3, 34.3, 36.0, 47.61, 47.64, 48.4, 50.0, 62.1, 62.5, 120.4, 120.9, 133.7, 134.0, 168.1, 168.4.

HRMS (ESI): calcd for C<sub>8</sub>H<sub>13</sub>Br<sub>2</sub>O<sub>2</sub> (M+H)<sup>+</sup> 300.9261, found 300.9260.

#### ***t*-Butyl 2-bromo-3-bromomethyl-4-pentenoate (19b)**

*tert*-Butyl diazoacetate (130 mg, 0.915 mmol) and 1,4-dibromo-2-butene (1.00 g), dissolved in dichloromethane (1 mL) was added by automatic syringe over 1 h to a stirred solution of the catalyst (30 mg, 0.038 mmol) and 1,4-dibromo-2-butene (1.00 g) in dichloromethane (1 mL) under nitrogen in a flask shielded from light. The resulting solution was stirred 24 h at ambient temperature under nitrogen. The solution was concentrated and the residue was purified by flash chromatography (SiO<sub>2</sub>, 98:3 pentane/ether), yielding the product (260 mg, 87% yield) as a colorless oil.

IR (neat, cm<sup>-1</sup>): = 2979, 1734, 1476, 1426.

$^1\text{H}$  NMR (500 MHz)  $\delta$  = 1.44, 1.46 (s, 9H), 2.92-3.00 (m, 1H), 3.5 (m, 1H), 3.64 (dd,  $J$  = 3.2, 10.0 Hz), 3.75 (dd,  $J$  = 5.3, 10.0 Hz, 1H), 4.2 (d,  $J$  = 9.9 Hz), 4.61 (d,  $J$  = 5.2 Hz, 1H), 5.25-5.29 (m, 2H), 5.71-5.75 (m, 1H), *syn/anti* ratio = 1/1.

$^{13}\text{C}$  NMR (75 MHz):  $\delta$  = 27.8, 27.9, 34.5, 36.3, 47.6, 48.6, 49.2, 51.4, 82.9, 83.3, 120.2, 120.8, 133.8, 134.2, 167.0, 167.4.

HRMS (ESI): calcd for  $\text{C}_{10}\text{H}_{16}\text{Br}_2\text{O}_2\text{Na}$  ( $\text{M}+\text{Na}$ ) $^+$  350.9394, found 350.9396.

#### ***tert*-Butyl 2-bromo-3,4-pentadienoate (23b)**

*tert*-Butyl diazoacetate (166 mg, 1.17 mmol) in distilled propargyl bromide (1.5 mL) was added by automatic syringe over 1 h to a stirred solution of the catalyst (30 mg, 0.038 mmol) in the propargyl bromide (1.5 mL) under nitrogen in a flask shielded from light. The resulting solution was stirred 24 h at ambient temperature under nitrogen. The solution was concentrated and the residue was purified by flash chromatography ( $\text{SiO}_2$ , 98:2 pentane/ether), yielding the product as a colorless oil (180 mg, 66% yield).

IR (neat,  $\text{cm}^{-1}$ ): = 2979, 1951, 1734, 1369.

$^1\text{H}$  NMR (500 MHz):  $\delta$  = 1.48 (s, 9H), 4.60 (dt,  $J$  = 6.5, 10.0 Hz, 1H), 4.73 (d,  $J$  = 9.5 Hz, 1H), 4.96 (d,  $J$  = 6.5 Hz, 1H), 4.97 (d,  $J$  = 6.5 Hz, 1H)

$^{13}\text{C}$  NMR (125 MHz):  $\delta$  = 27.8, 44.6, 78.3, 83.0, 89.6, 167.0, 209.2.

HRMS (ESI): calcd for  $\text{C}_9\text{H}_{13}\text{BrO}_2\text{Na}$  ( $\text{M}+\text{Na}$ ) $^+$  254.991, found 254.991.

#### **Ethyl 2-bromo-3-ethyl-3,4-pentadienoate (24a)**

EDA (218 mg, 2.00 mmol) in the 1-bromo-2-pentyne (1.5 mL) was added by automatic syringe over 1 h to a stirred solution of the catalyst (40 mg, 0.050 mmol) in the 1-bromo-2-pentyne (1.5 mL) under nitrogen in a flask shielded from light. The resulting solution was stirred 24 h at ambient temperature under nitrogen. The solution was concentrated and the residue was purified by flash chromatography ( $\text{SiO}_2$ , 94:6 pentane/ether), yielding the product (316 mg, 71% yield) as a colorless oil.

IR (neat,  $\text{cm}^{-1}$ ): = 2974, 2935, 1951, 1744, 1456.

$^1\text{H}$  NMR (500 MHz):  $\delta$  = 1.16 (m, 3H), 0.92 (m, 3H), 2.00-2.14 (m, 2H), 4.06-4.16 (m, 2H), 4.74-4.86 (m, 3H)

$^{13}\text{C}$  NMR (75 MHz):  $\delta$  = 11.9, 14.1, 21.8, 48.9, 62.3, 79.4, 103.5, 168.2, 206.8.

HRMS (ESI): calcd for  $\text{C}_9\text{H}_{14}\text{BrO}_2$  ( $\text{M}+\text{H}$ ) $^+$  233.0172, found 233.0174.

#### ***tert*-Butyl 2-bromo-3-ethyl-3,4-pentadienoate (24a)**

*tert*-Butyl diazoacetate (176 mg, 1.24 mmol) in the 1-bromo-2-pentyne 1.5 mL was added by automatic syringe over 1 h to a stirred solution of the catalyst (30 mg, 0.038 mmol) in the 1-bromo-2-pentyne (1.5 mL) under nitrogen in a flask shielded from light. The resulting solution was stirred 24 h at ambient temperature under nitrogen. The solution was concentrated and the residue was purified by flash chromatography ( $\text{SiO}_2$ , 94:6 pentane/ether), yielding the product as a colorless oil (240 mg, 74% yield).

IR (neat,  $\text{cm}^{-1}$ ): = 2975, 2935, 1951, 1742, 1457, 1369.

$^1\text{H}$  NMR (300 MHz):  $\delta$  = 1.03 (t,  $J$  = 7.5 Hz, 3H), 1.46 (s, 9H), 2.17 (m, 2H), 4.81 (s, 1H), 4.89 (m, 2H)

$^{13}\text{C}$  NMR (75 MHz):  $\delta$  = 11.9, 21.9, 27.9, 50.2, 79.3, 82.9, 103.4, 166.4, 206.6.

HRMS (ESI): calcd for  $\text{C}_{22}\text{H}_{34}\text{Br}_2\text{O}_4\text{Na}$  ( $2\text{M}+\text{Na}$ ) $^+$  545.0706, found 545.0713.

***tert*-Butyl 2-chloro-4-hexenoate (26)**

*tert*-Butyl diazoacetate (166 mg, 1.17 mmol) in 3-chloro-1-butene (1.5 mL) was added by automatic syringe over 1 h to a stirred solution of the catalyst (30 mg, 0.038 mmol) in the 3-chloro-1-butene (1.5 mL) under nitrogen in a flask shielded from light. The resulting solution was stirred 24 h at ambient temperature under nitrogen. The solution was concentrated and the residue was purified by flash chromatography (SiO<sub>2</sub>, 19:1 hexane/dichloromethane), yielding the product as a colorless oil (77% yield, 184 mg).

IR (neat, cm<sup>-1</sup>): = 2977, 1740, 1464, 1426.

<sup>1</sup>H NMR (300 MHz): δ = 5.59 (m, 1H), 5.39 (m, 1H), 4.13 (t, J = 6.9 Hz, 1H), 2.50-2.70 (m, 2H), 1.682 (m, 3H), 1.47 (s, 9H).

<sup>13</sup>C NMR (75 MHz): δ = 168.4, 130.0, 124.8, 82.5, 57.9, 38.4, 27.9, 18.0.

HRMS (ESI): calcd for C<sub>10</sub>H<sub>18</sub>ClO<sub>2</sub> (M+H)<sup>+</sup> 205.0990, found 205.0983.

pashu\_ii\_150-8.jdf

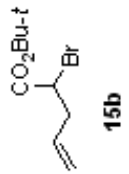

9

(Millions)

7.2620

5.7531  
5.7412  
5.7393

5.1796  
5.1530  
5.1457

4.1333  
4.1196  
4.1040

2.8122  
2.8095  
2.7967  
2.6858  
2.6830

1.4682  
1.4655  
1.4362

0.961

2.024

1.047

0.998

1.016

X : parts per Million : 1H

pashu\_ii\_150-3.jdf

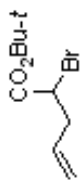

15b

3.0

2.0

1.0

0

(Millions)

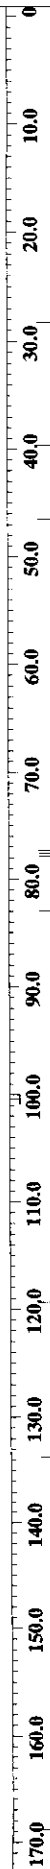

168.8173  
133.7811  
119.3630  
82.9800  
77.8178  
77.5622  
77.3104  
46.5436  
39.6531  
28.2796

X : parts per Million : 13C

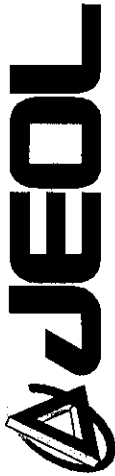

Filename = pashu\_ji\_164A-4.jdf  
Author = delta  
Experiment = single\_pulse.exp  
Sample\_id = S#563106  
Solvent = CHLOROFORM-D  
Creation\_time = 26-MAR-2006 18:21:00  
Revision\_time = 26-MAR-2006 16:05:44  
Current\_time = 26-MAR-2006 16:21:07  
Content = Single Pulse Experiment  
Data\_format = 1D\_REAL  
Dir\_size = 16384  
Dir\_title = 1H  
Dim\_units = [ppm]  
Dimensions = X  
Site = Eclipse+ 500  
Spectrometer = DELTA\_NMR  
Field\_strength = 11.7473579[T] (500[MH  
X\_acq\_duration = 2.1823488[s]  
X\_domain = 1H  
X\_freq = 500.15991521[MHz]  
X\_offset = 5[ppm]  
X\_points = 16384  
X\_prescans = 0  
X\_resolution = 0.45822189[Hz]  
X\_sweep = 7.50750751[kHz]  
Clipped = FALSE  
Mod\_return = 1  
Scans = 20  
Total\_scans = 20  
X\_90\_width = 18.5[us]  
X\_acq\_time = 2.1823488[s]  
X\_angle = 45[deg]  
X\_pulse = 9.25[us]  
Initial\_wait = 1[s]  
Phase\_preset = 3[us]  
Recvr\_gain = 13  
Relaxation\_delay = 4[s]  
Temp\_get = 24.5[dc]  
Unblank\_time = 2[us]

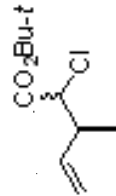

16b

pashu\_ji\_164A-4.jdf

9

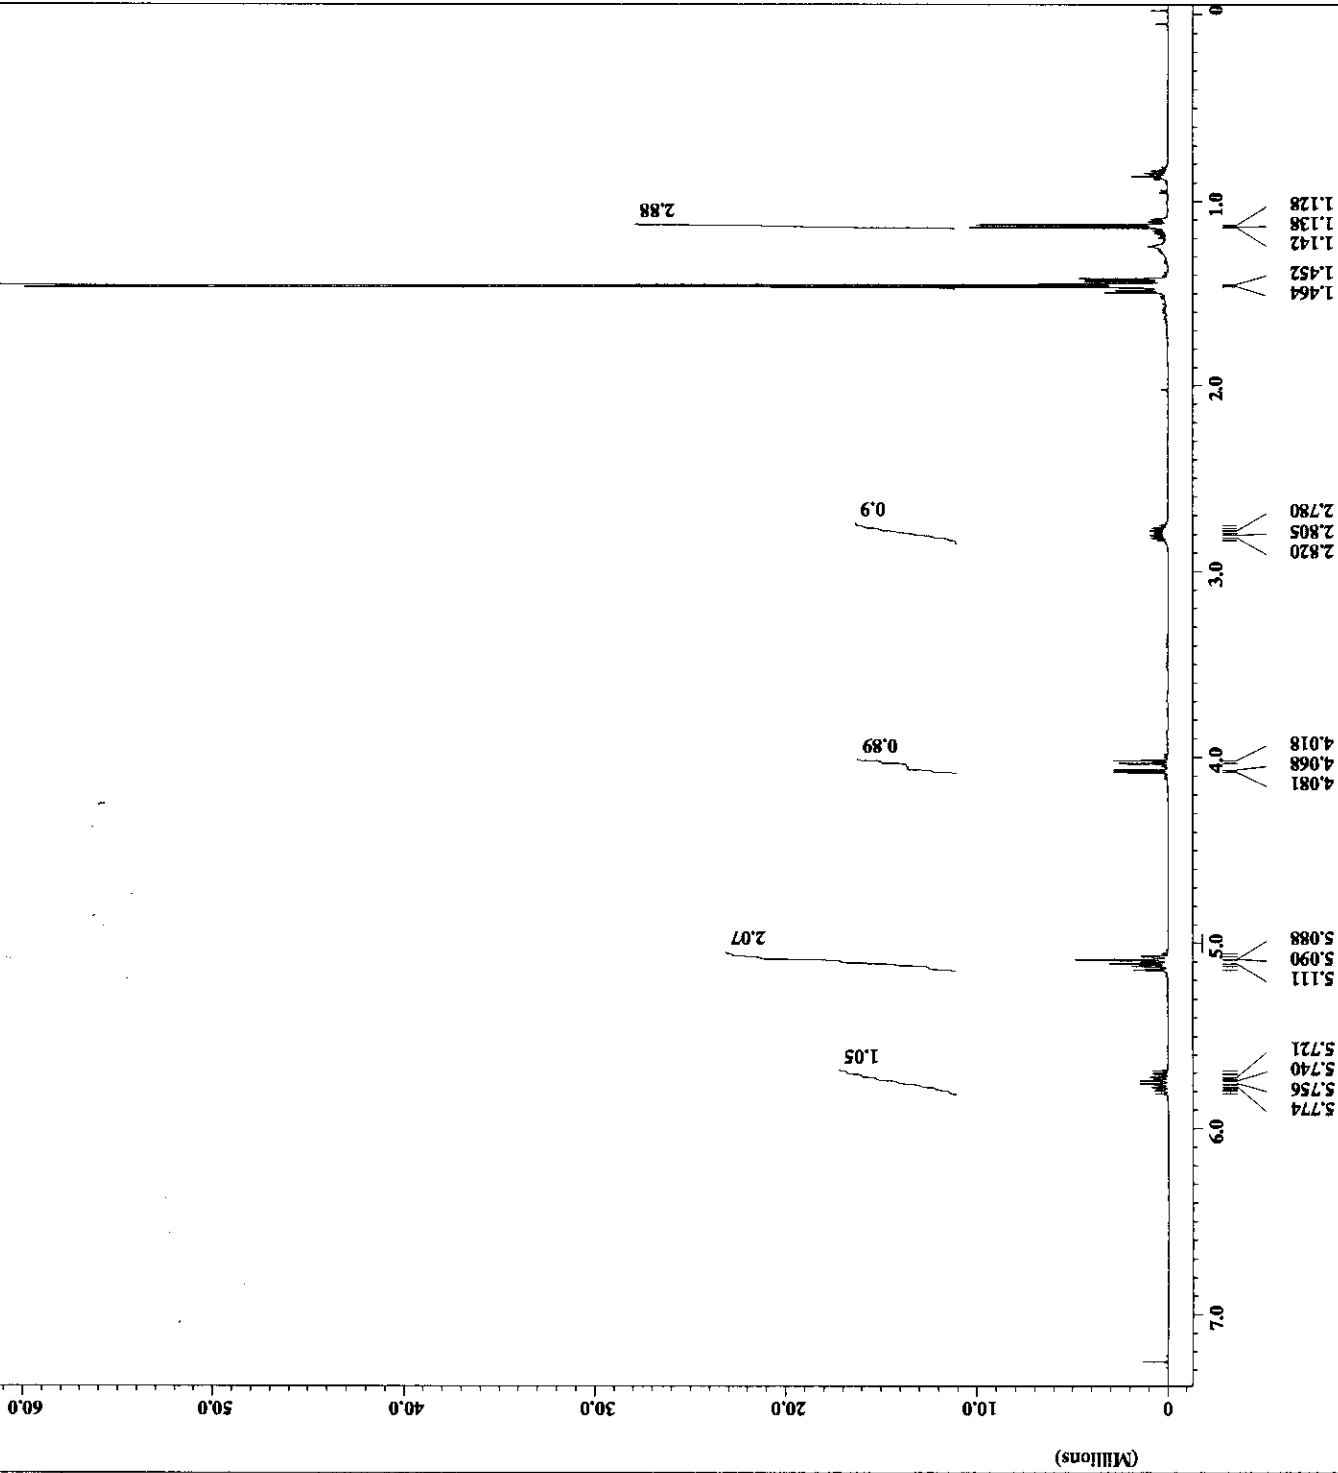



pashu\_ji\_164a-3.jdf

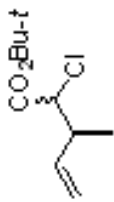

16b

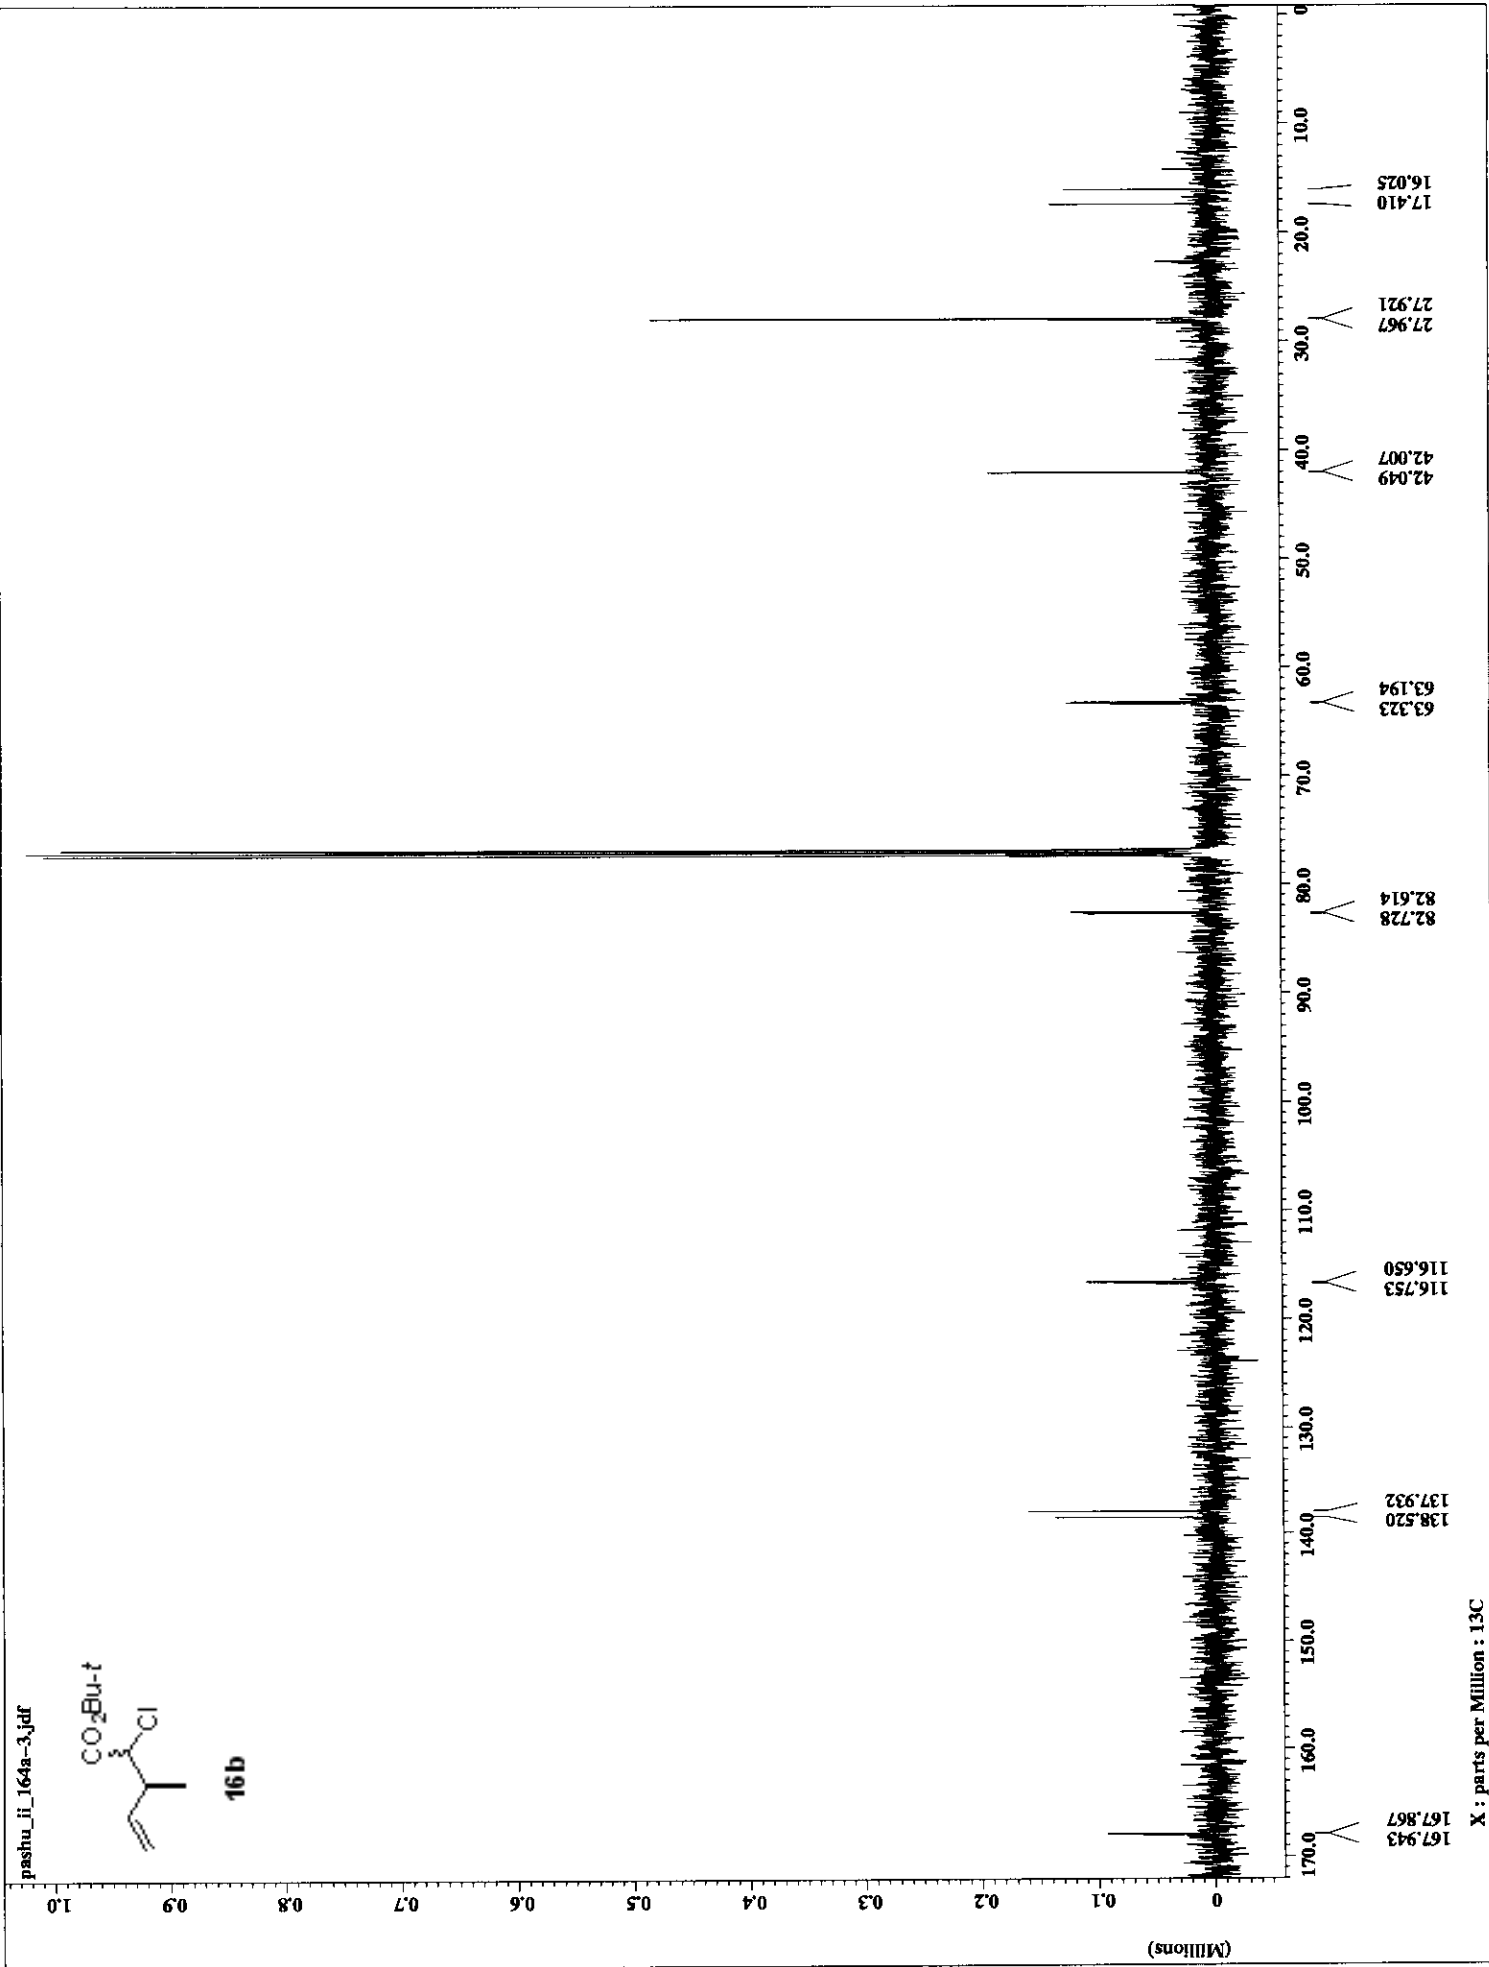

pashu\_ii\_113-3.jdf

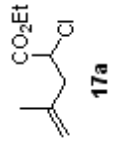

abundance

3.73

2.79

1

0.99

1.83

0.93

2.09

4.889

0 1.0 2.0 3.0 4.0 5.0 6.0 7.0

X : parts per Million : 1H

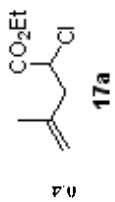

0.4

0.3

0.2

0.1

0

abundance

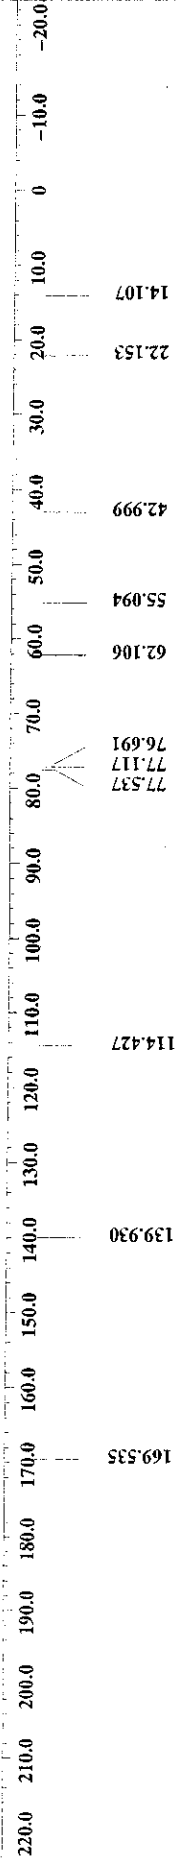

pashu\_ii\_156-5.jdf

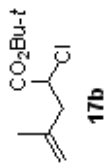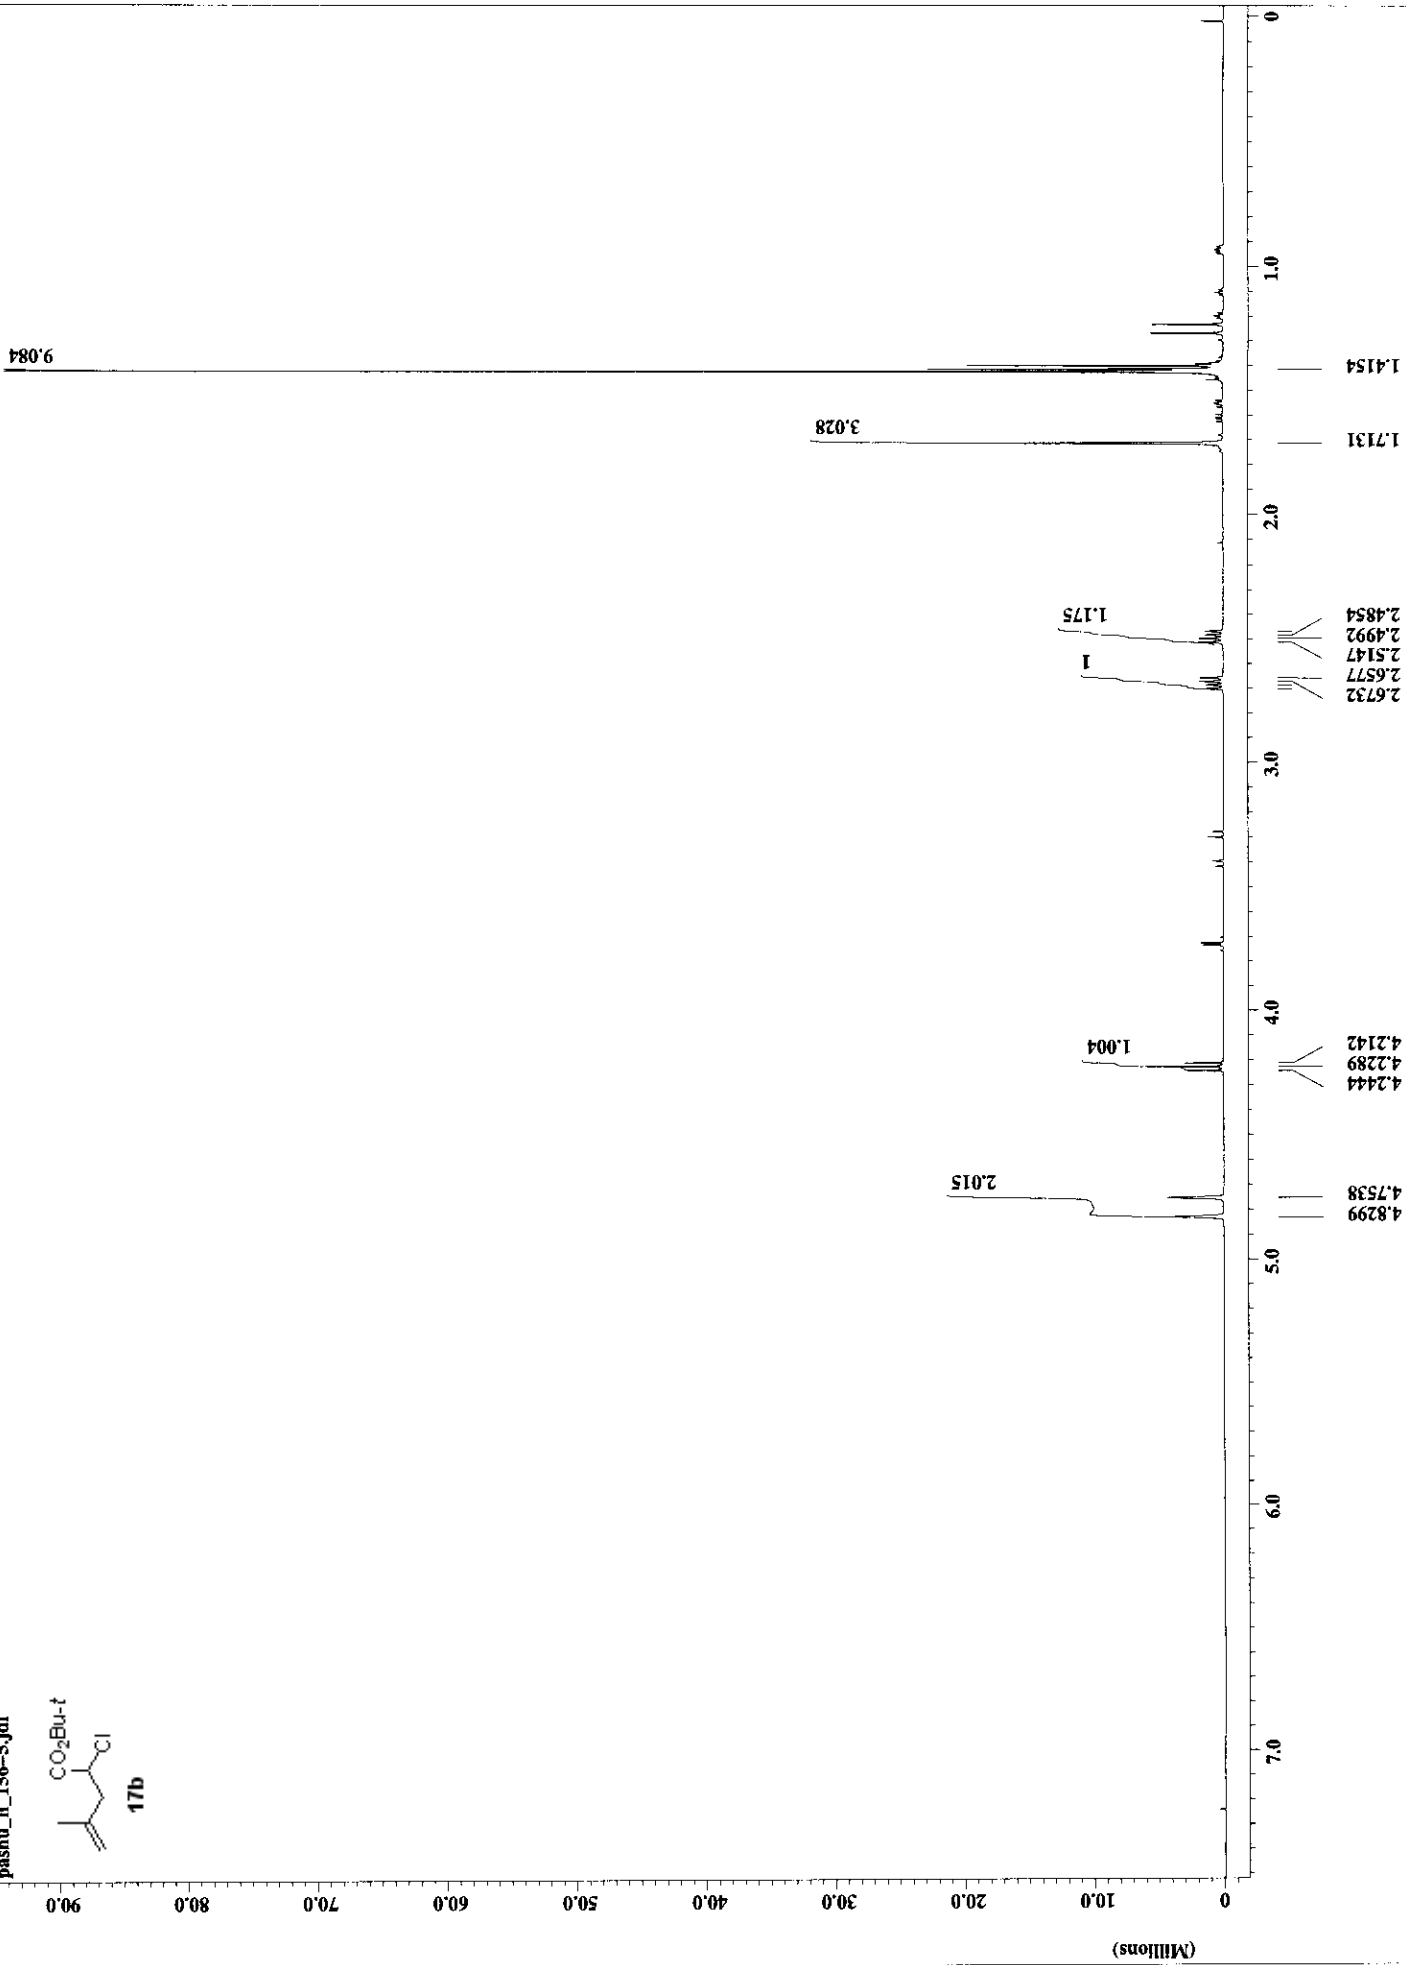

X : parts per Million : 1H

pashu\_i1\_156\_copy-3.jdf

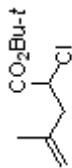

17b

30.0

20.0

10.0

(Millions)

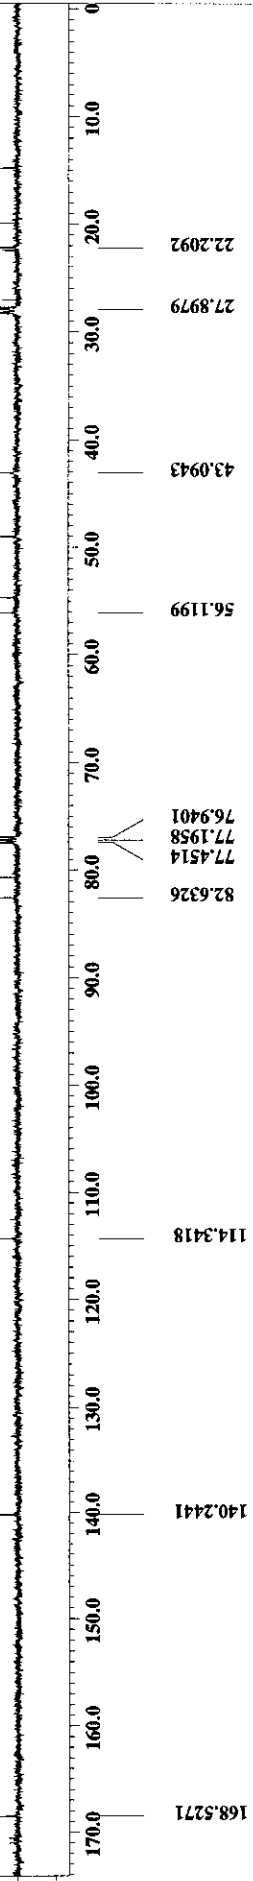

X : parts per Million : 13C

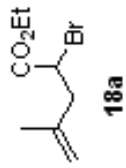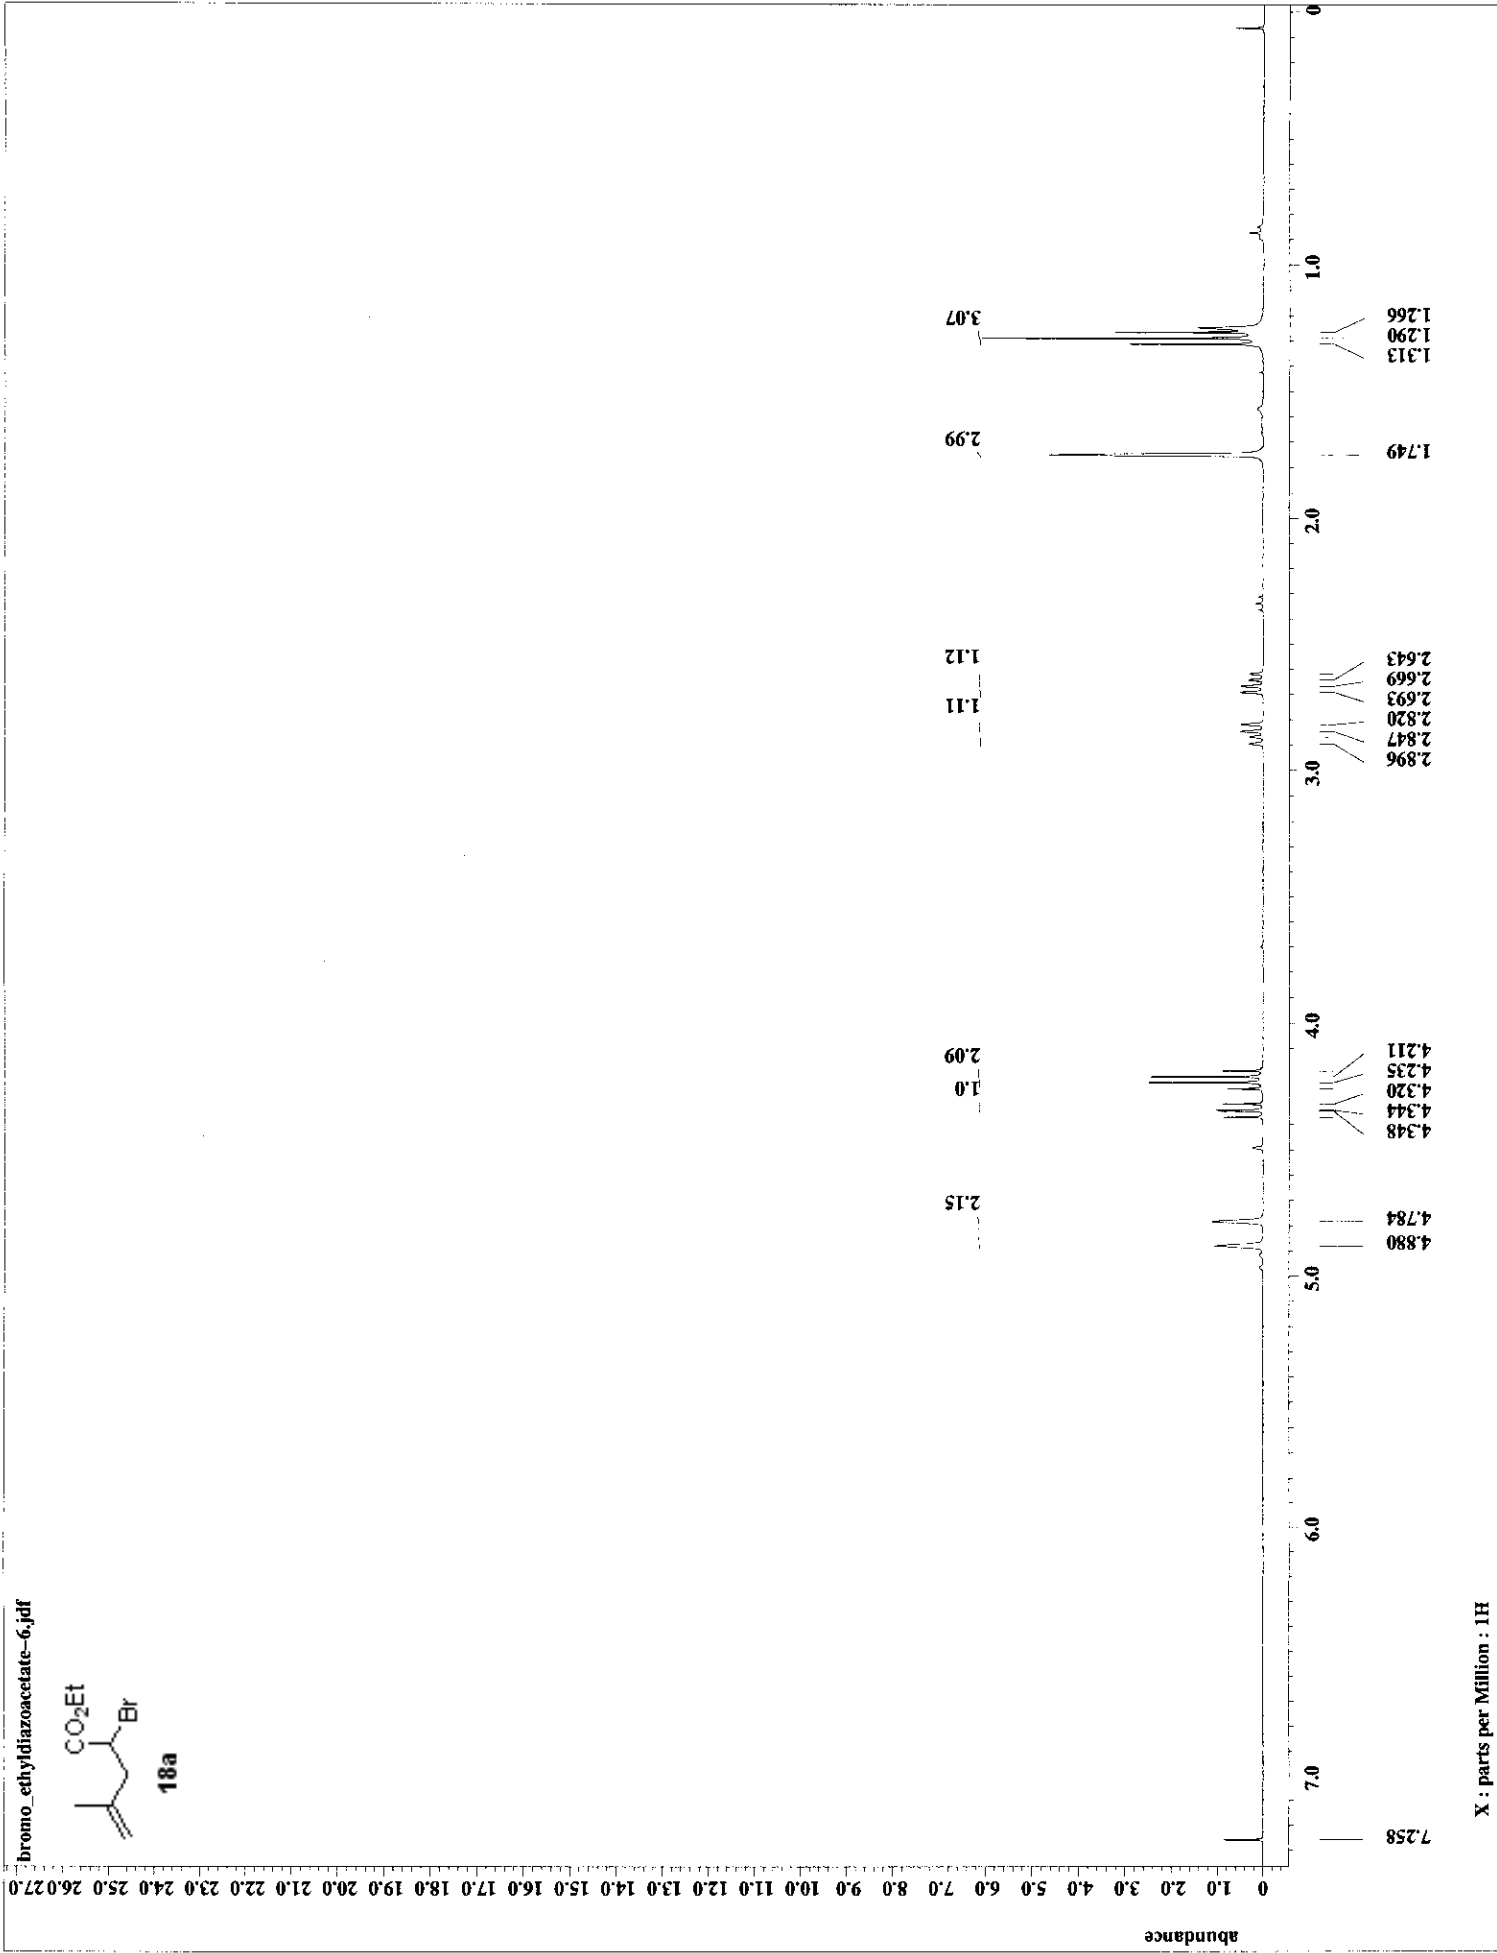

brnoethyldiazacetate-4.jdf

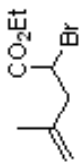

18a

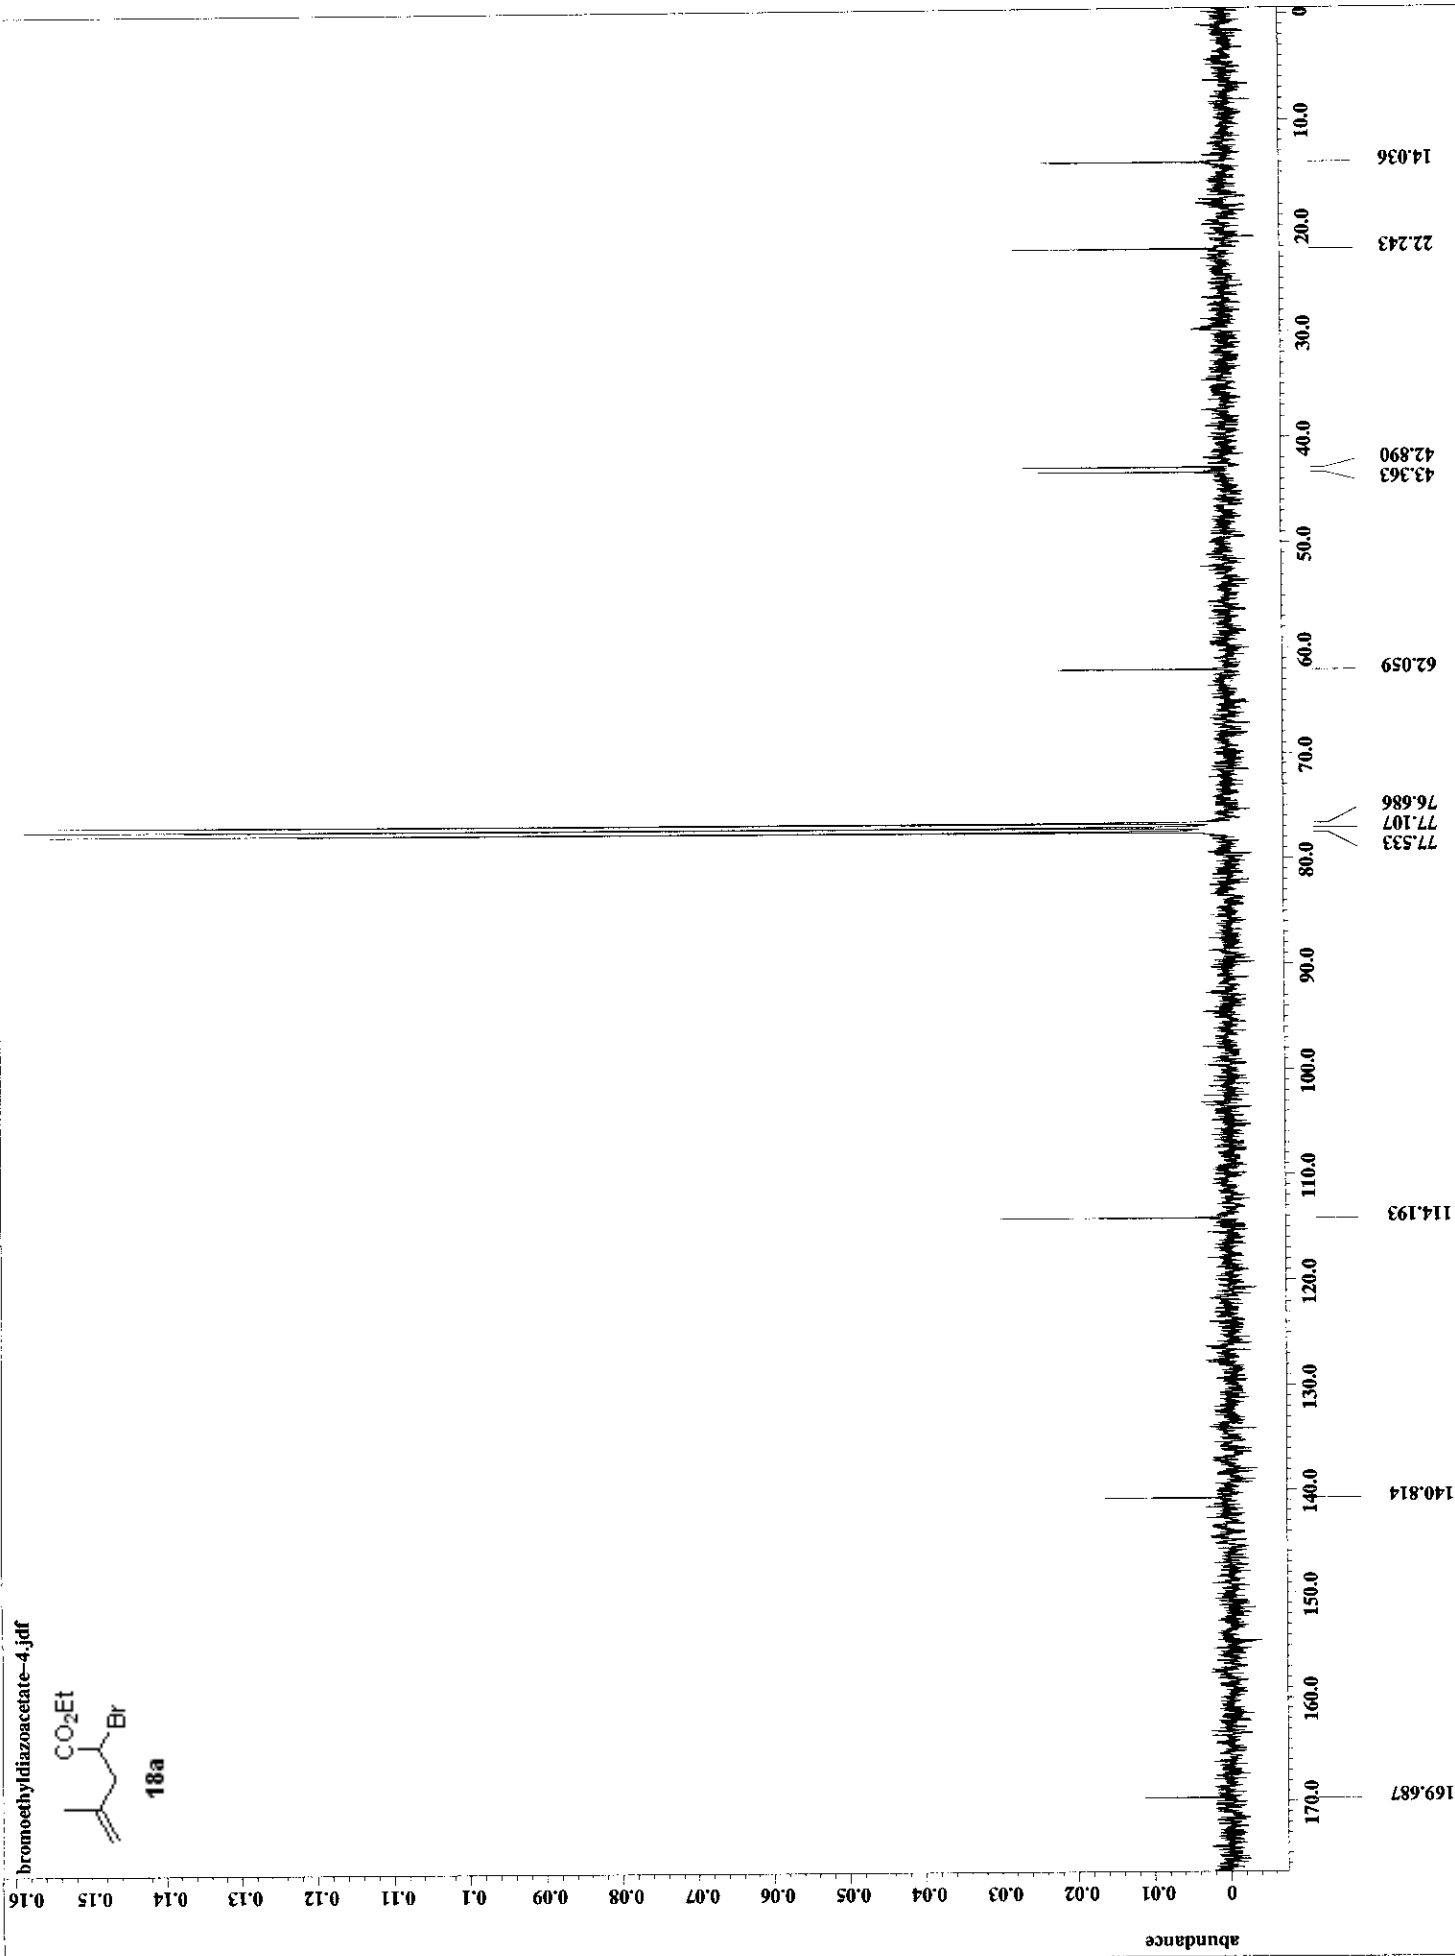

X : parts per Million : 13C

pashu\_ii\_153-9.jdf

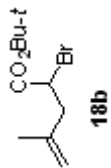

9.073

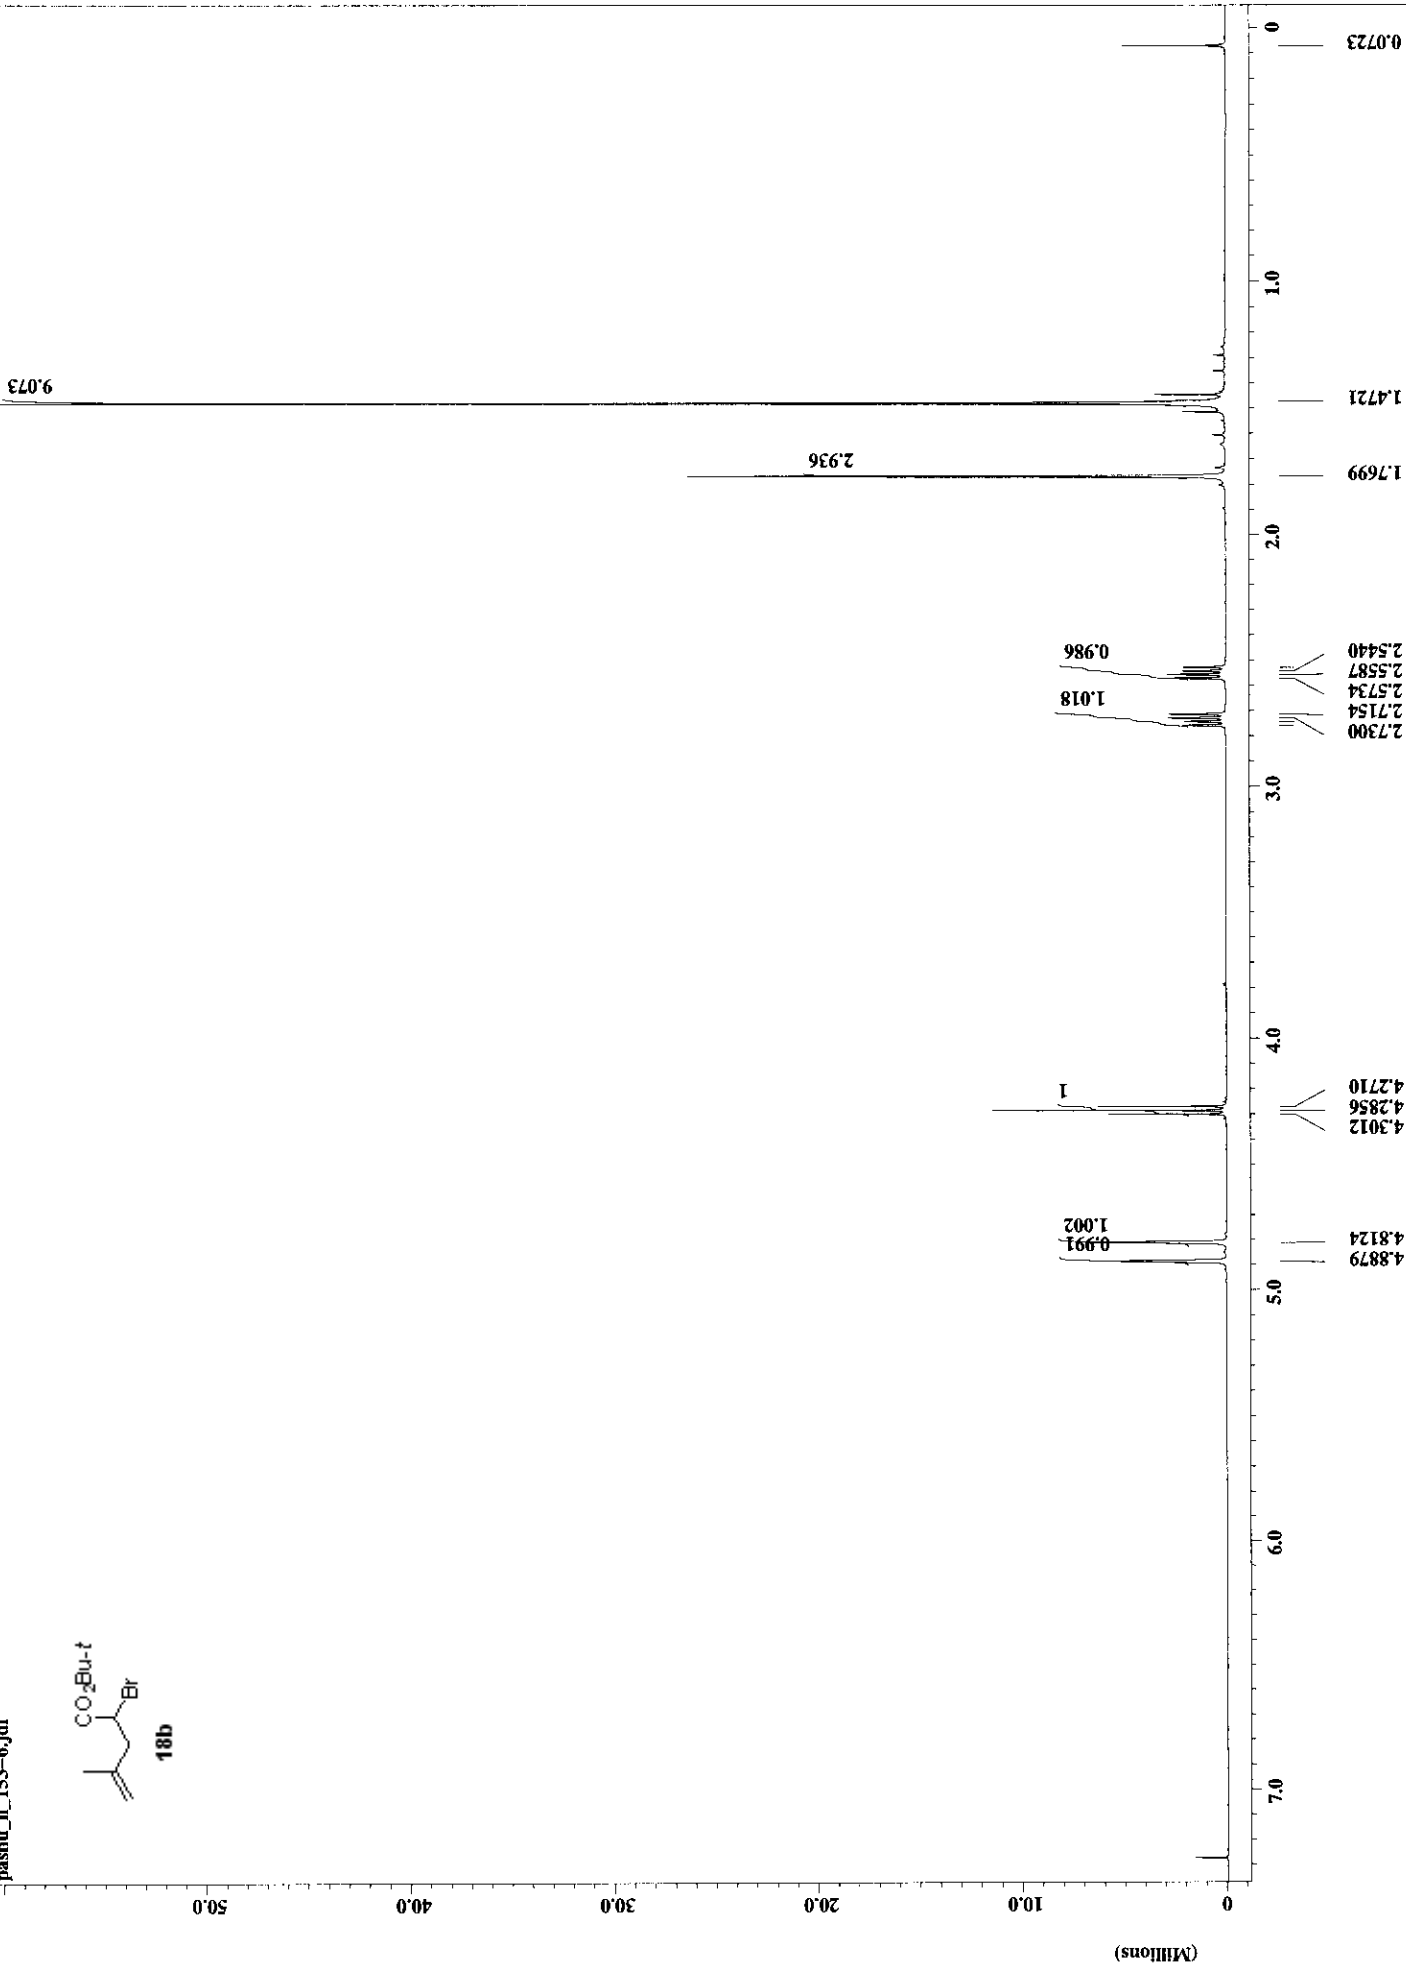

X : parts per Million : 1H



pashu\_ii\_153-4.jdf

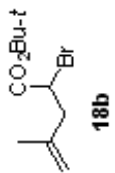

3.0

2.0

1.0

(Millions)

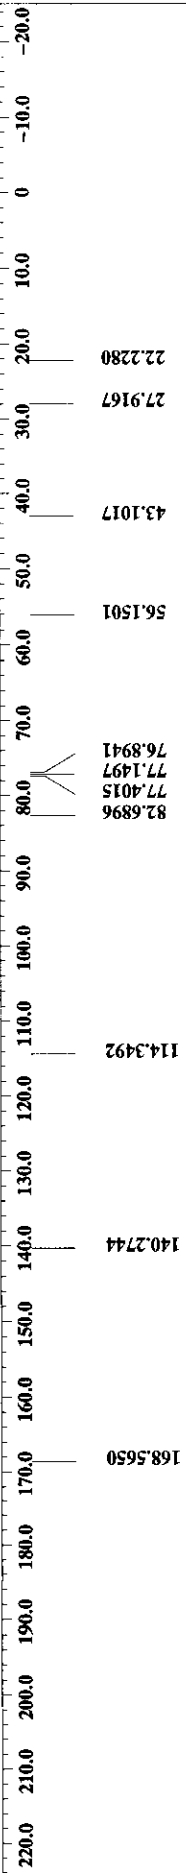

X : parts per Million : 13C

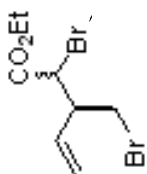

19a

abundance

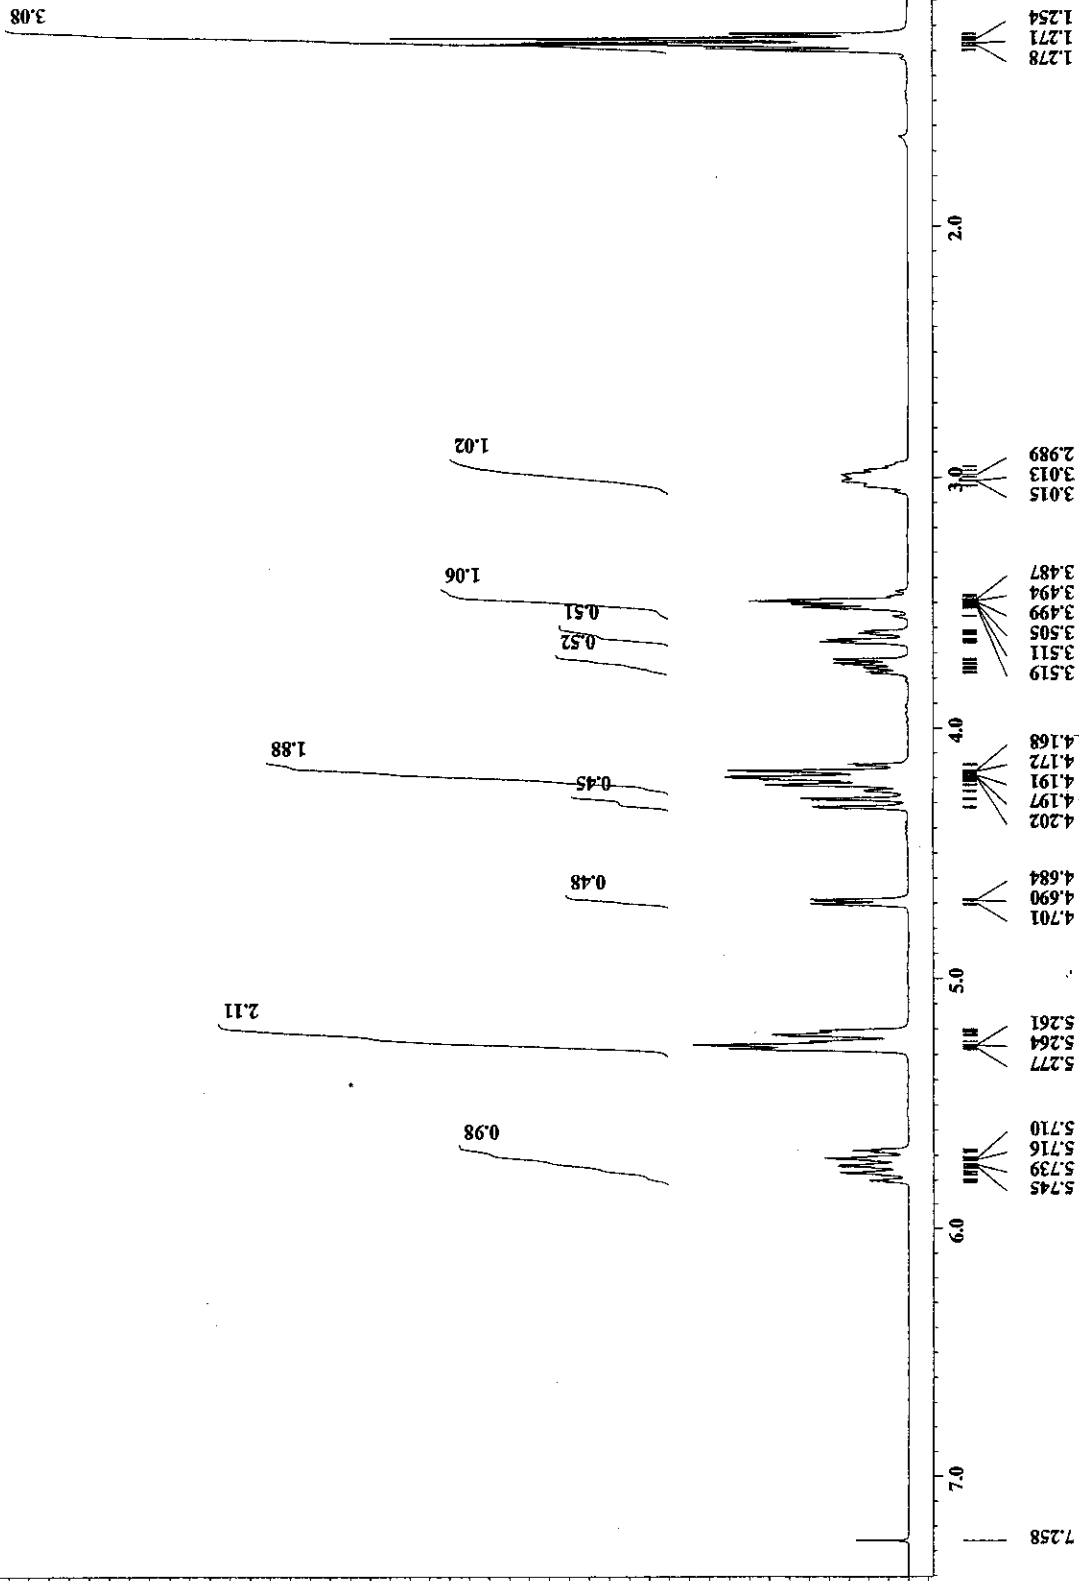

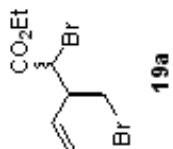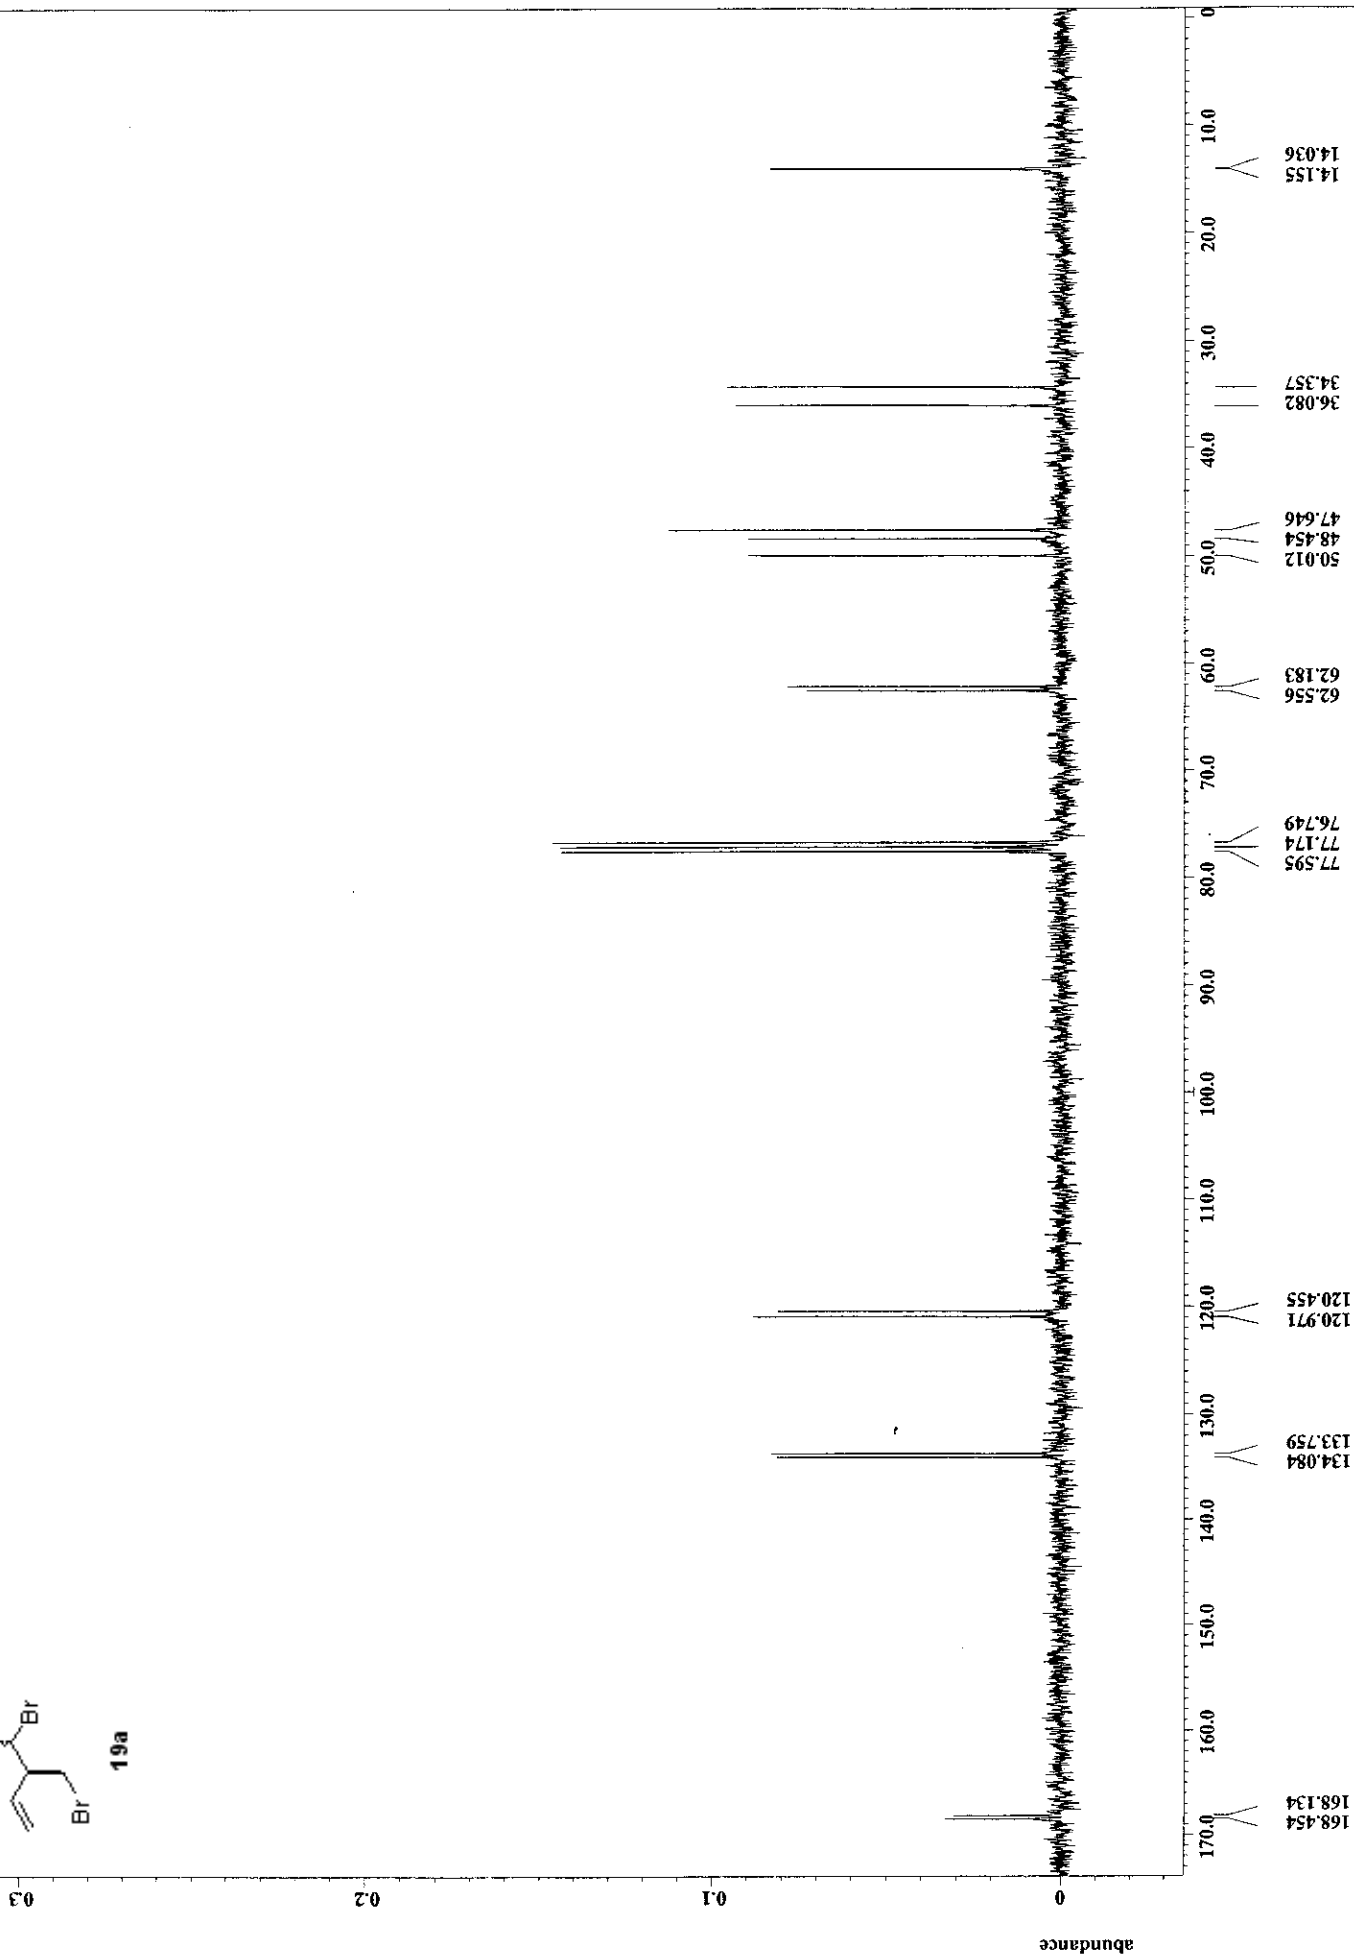

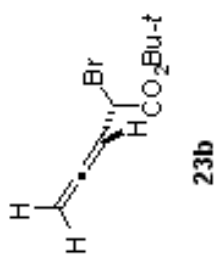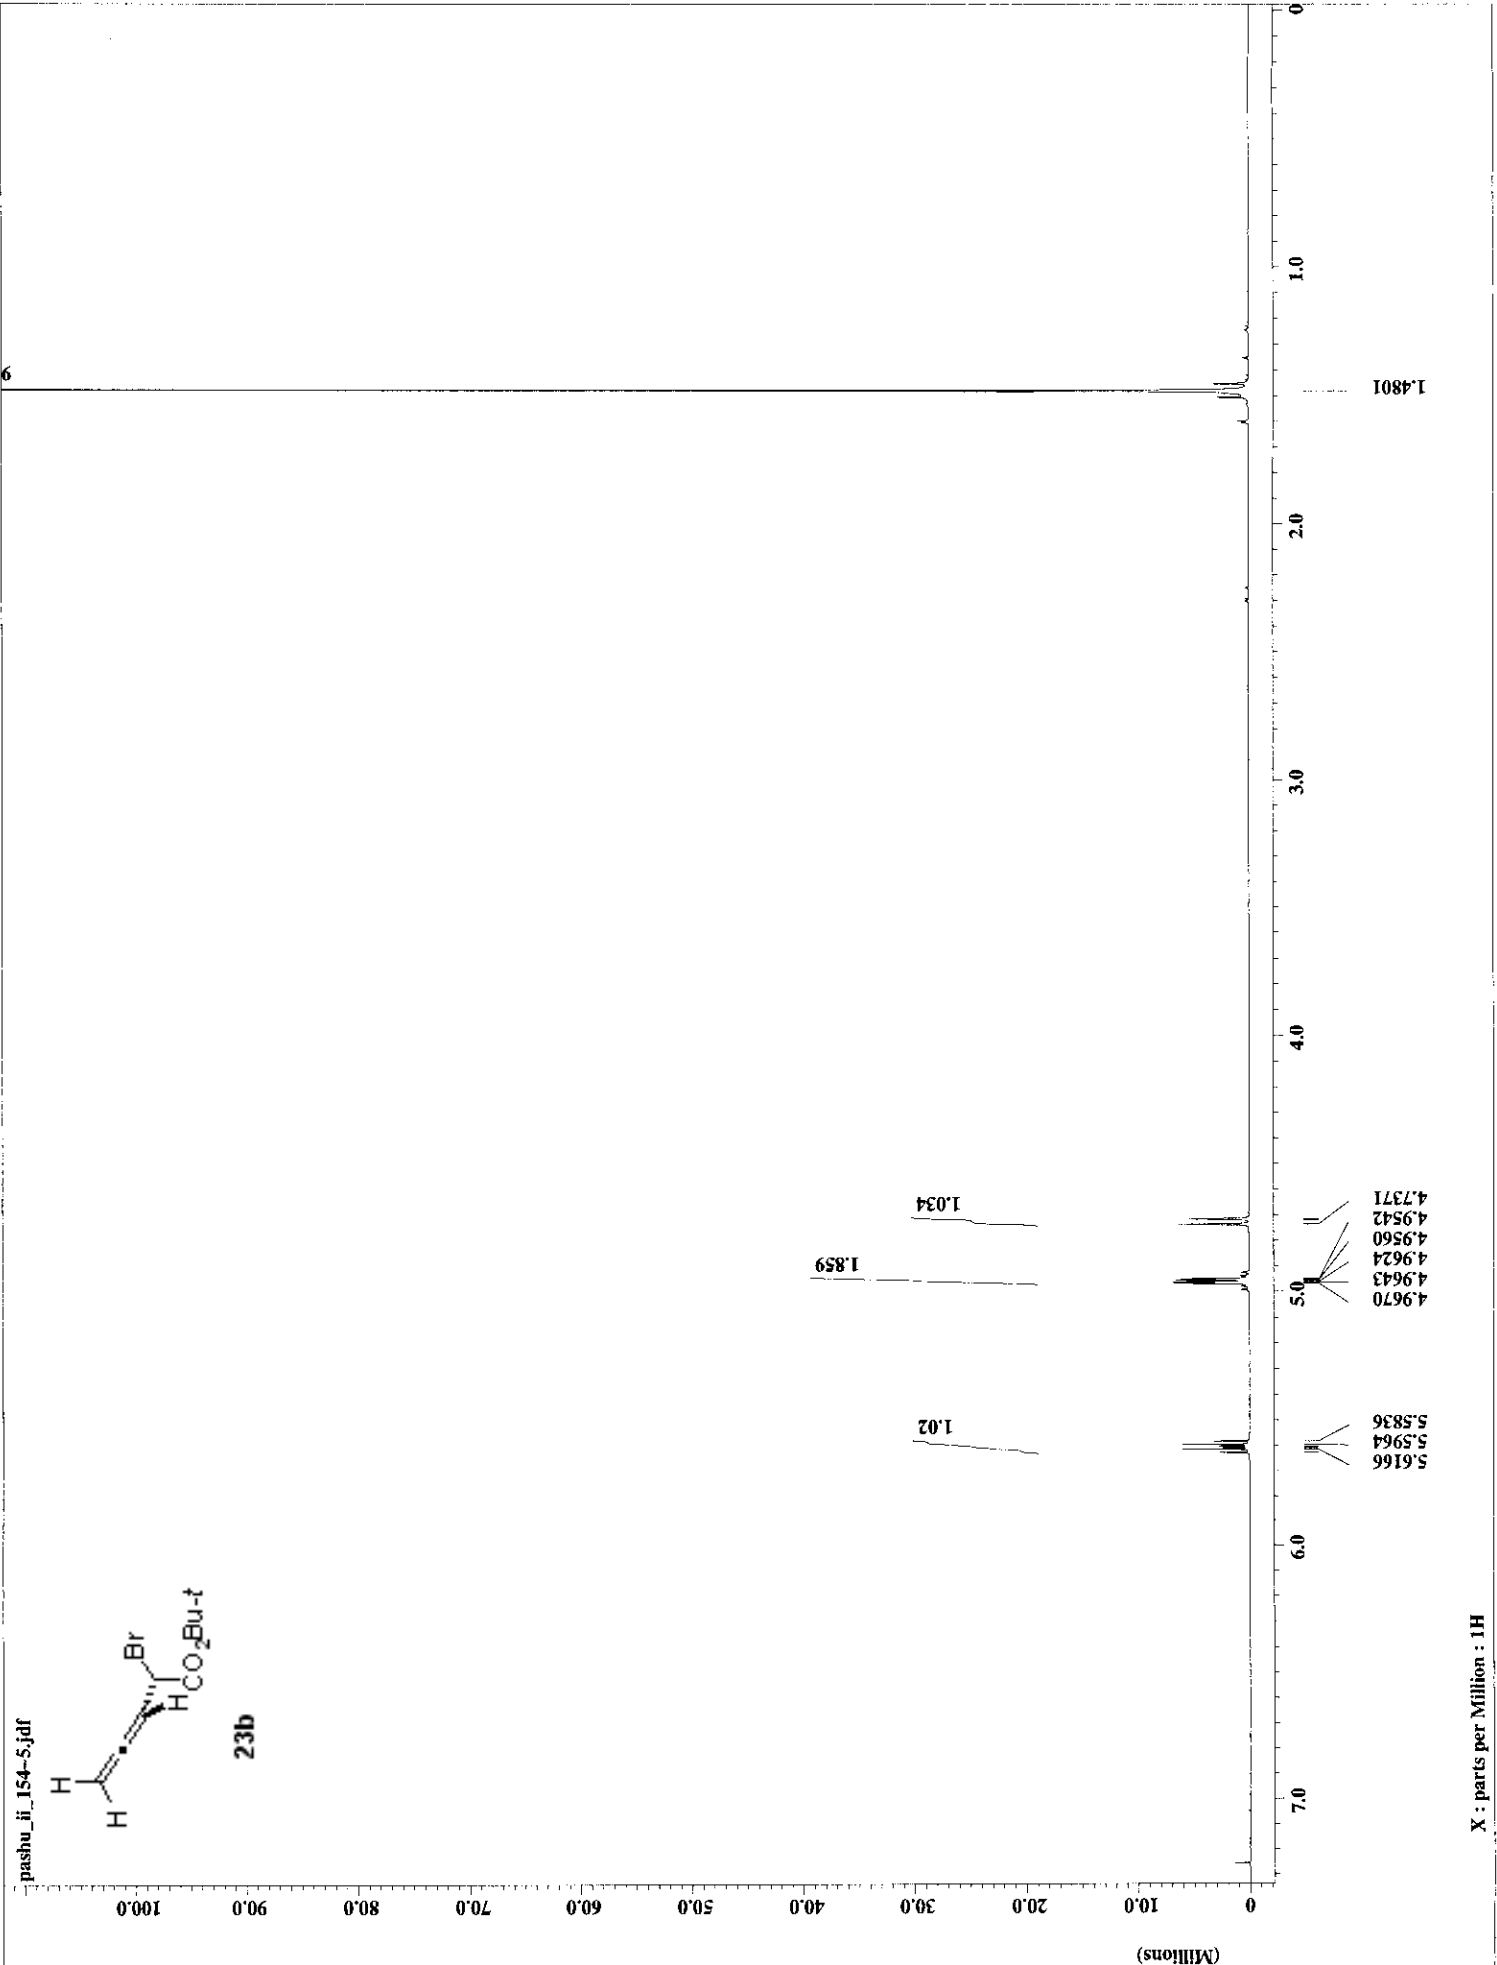

pashu\_ii\_154-3.jdt

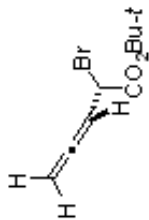

23b

(Millions)

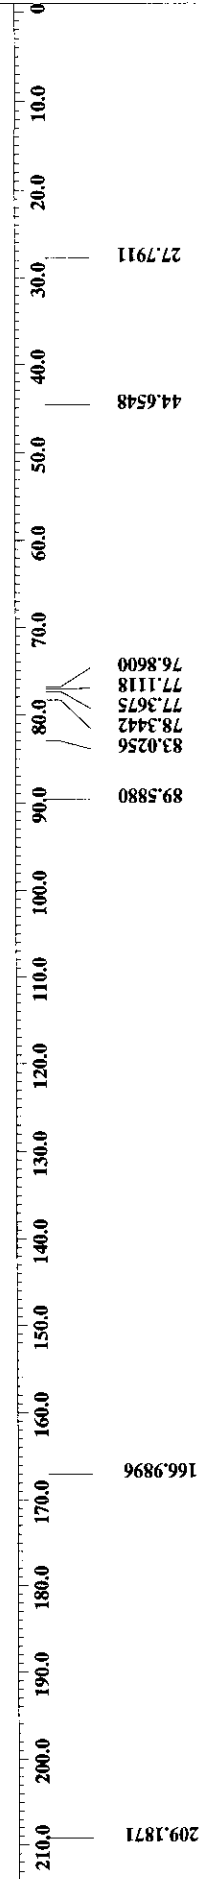

X : parts per Million : 13C

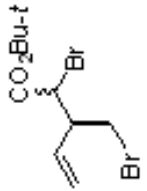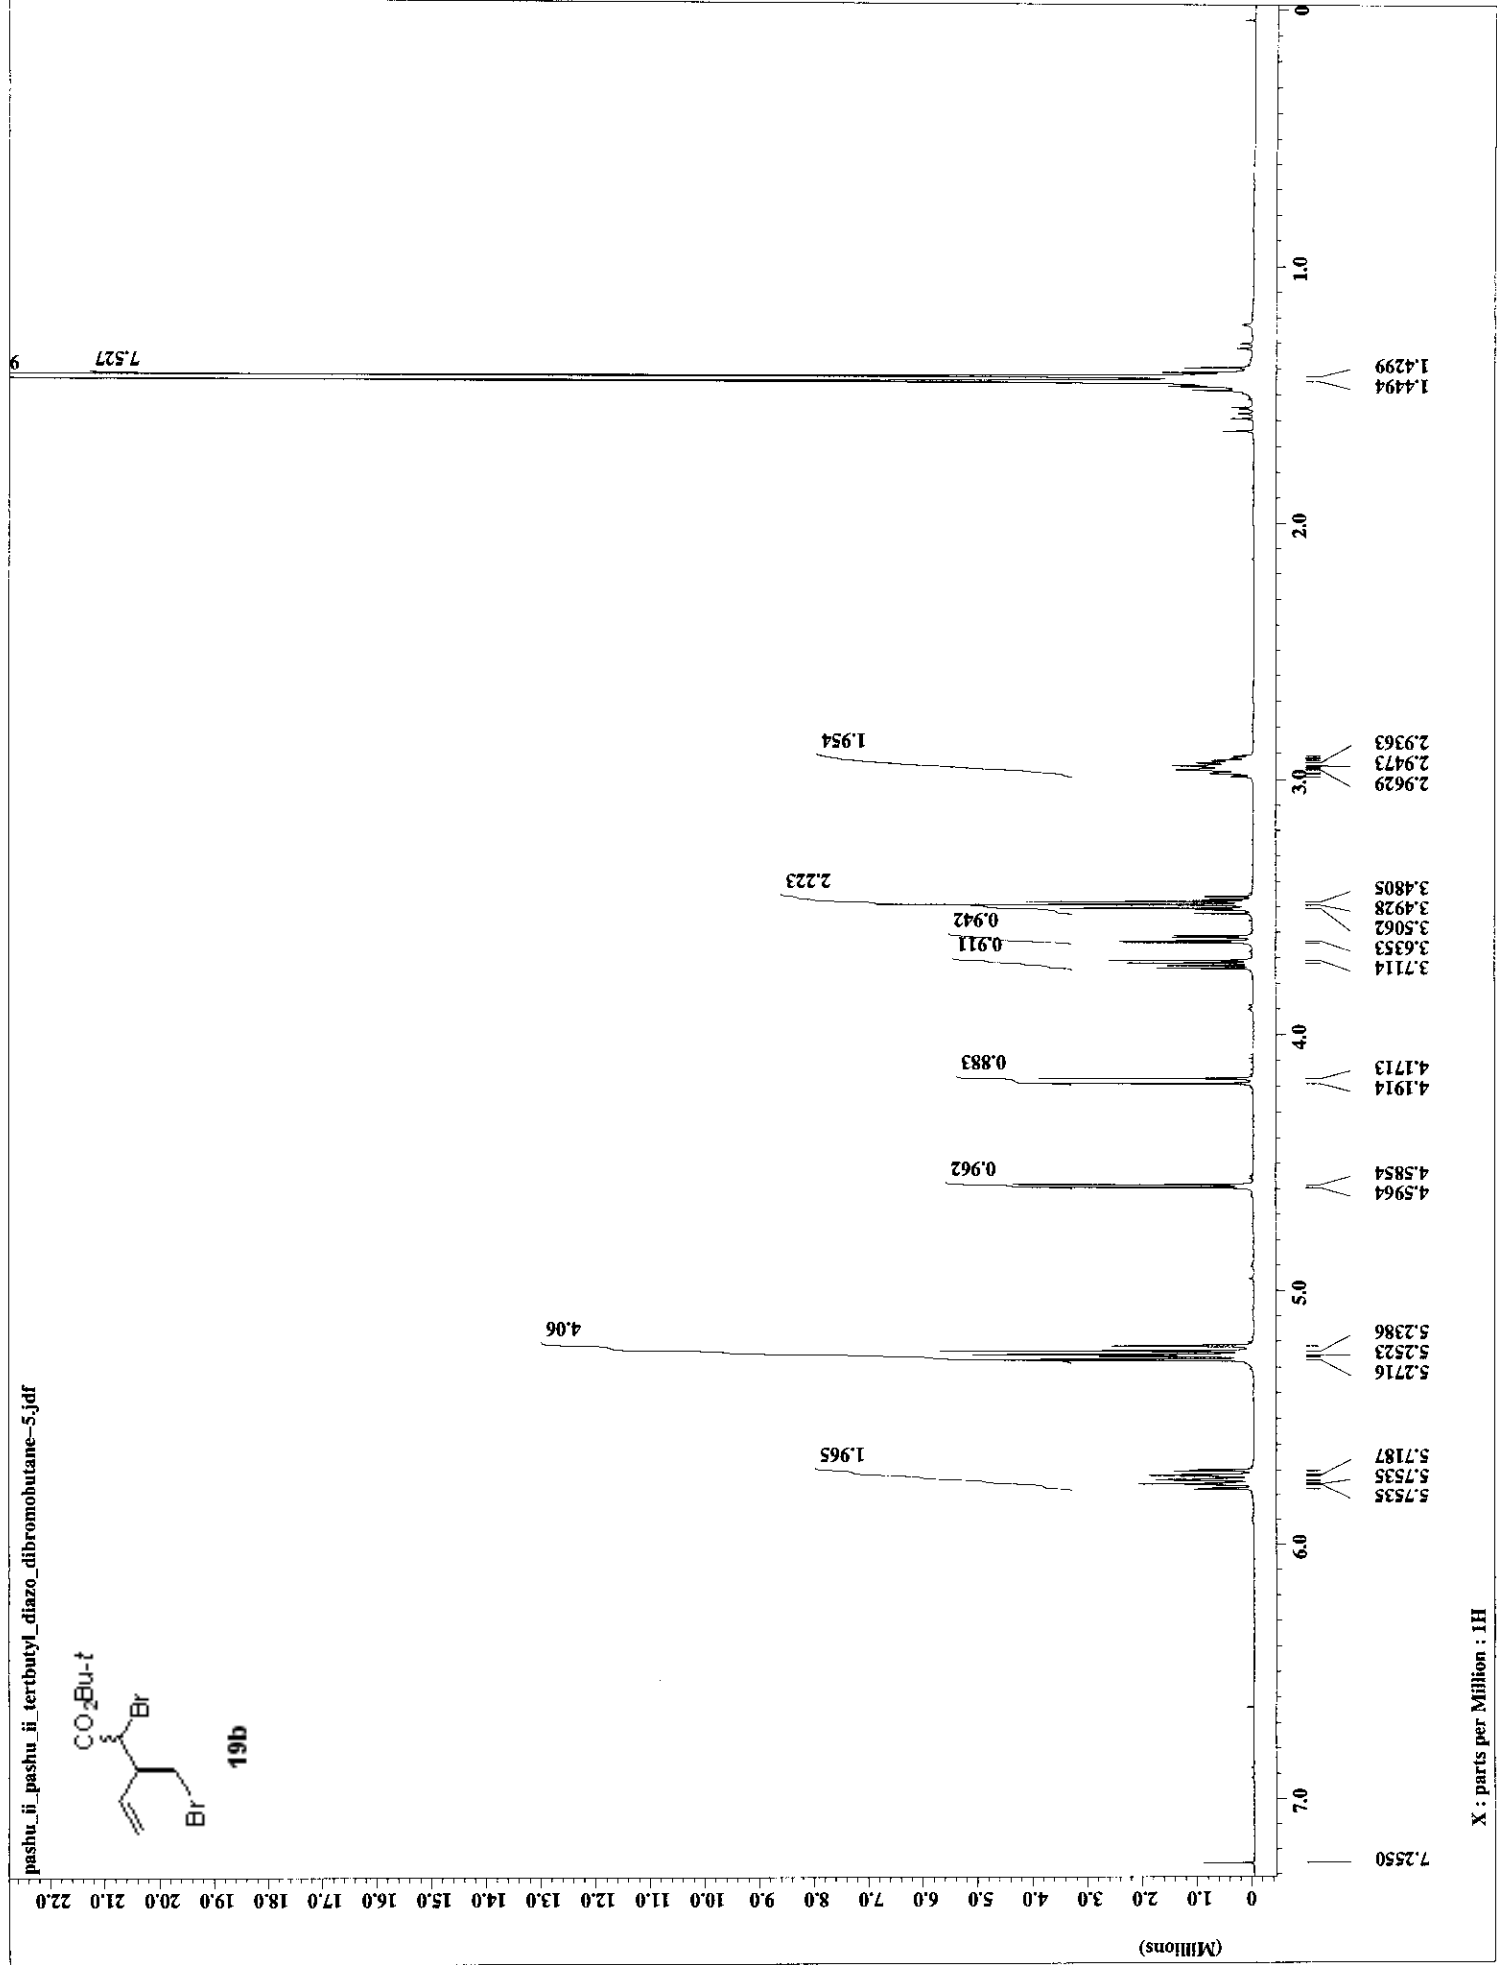

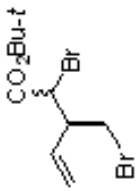

19b

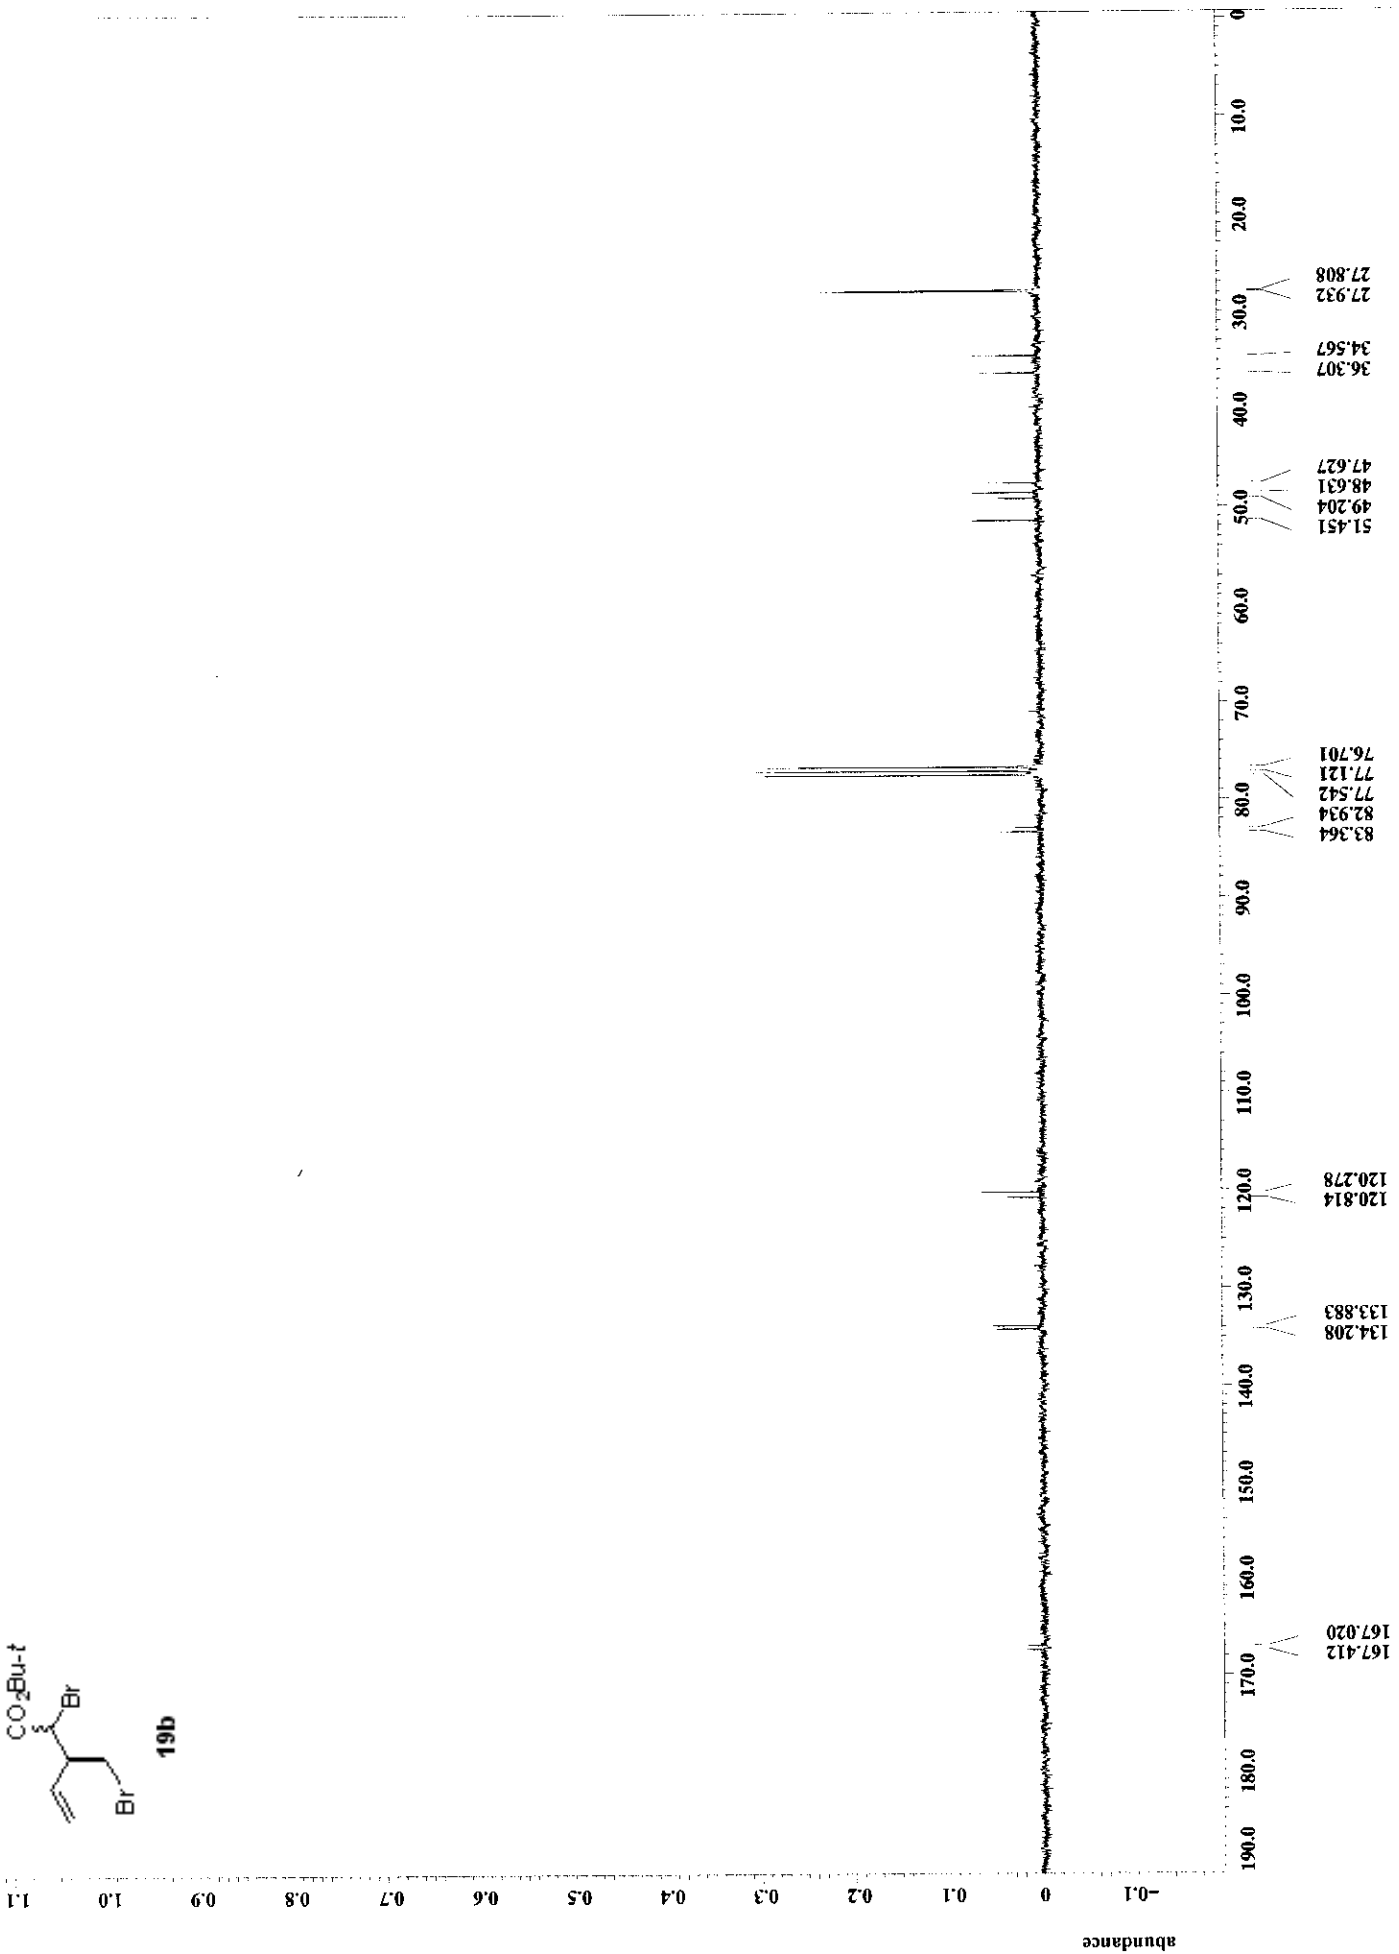

pashu\_ii\_alkyne\_ethylidiazacetate\_sigma-3.jdf

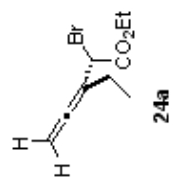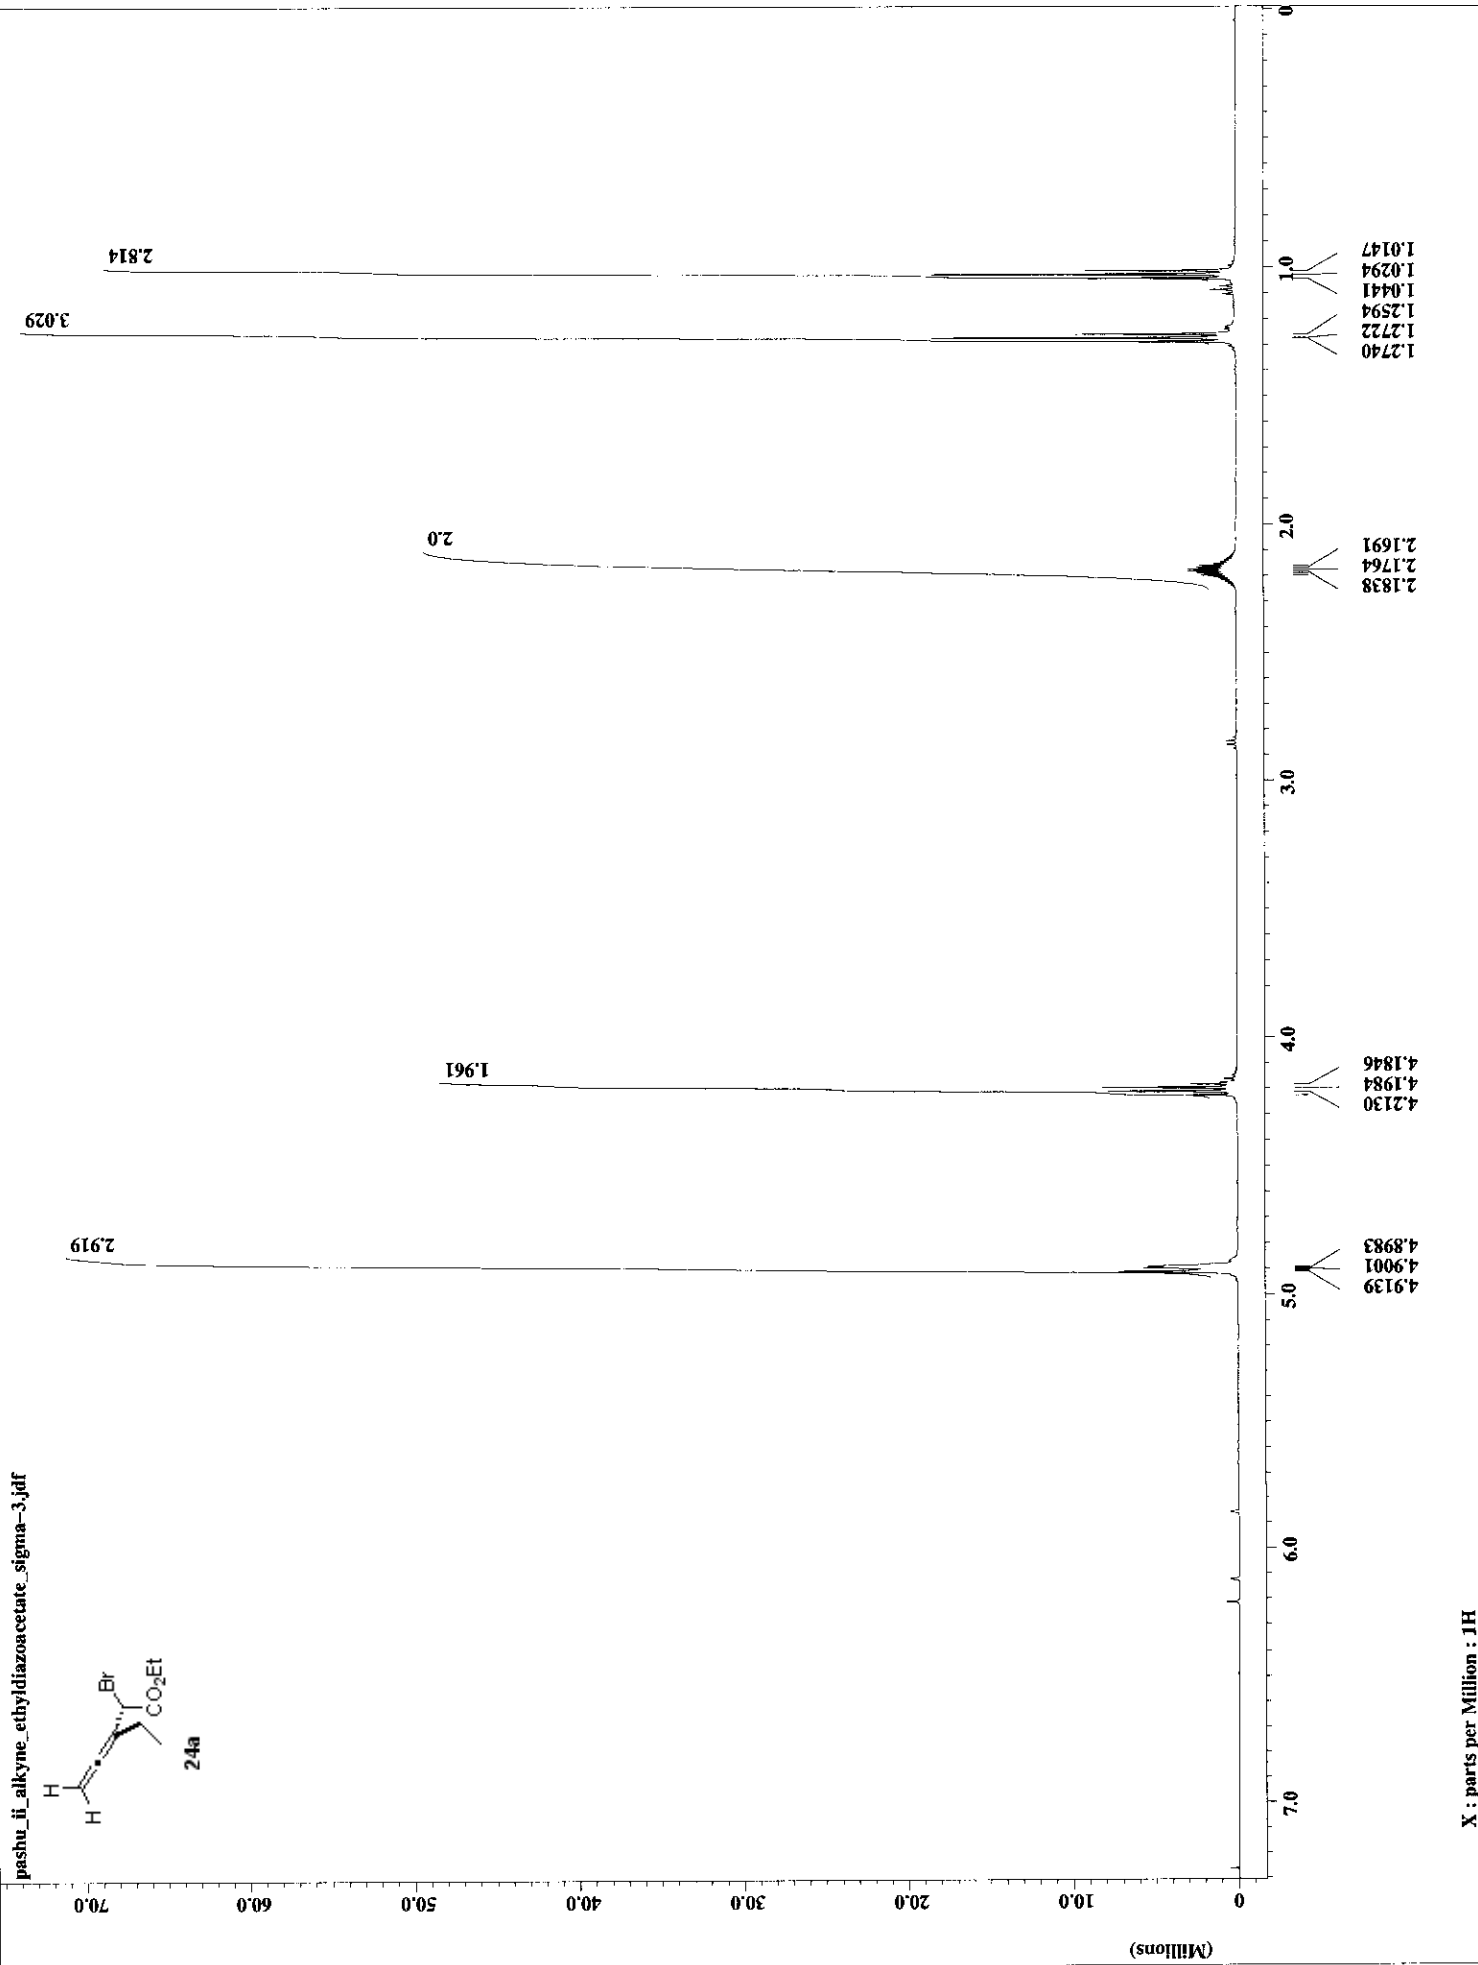

X : parts per Million : 1H



alkyne\_silvercat\_sigma-2.jdf

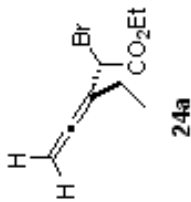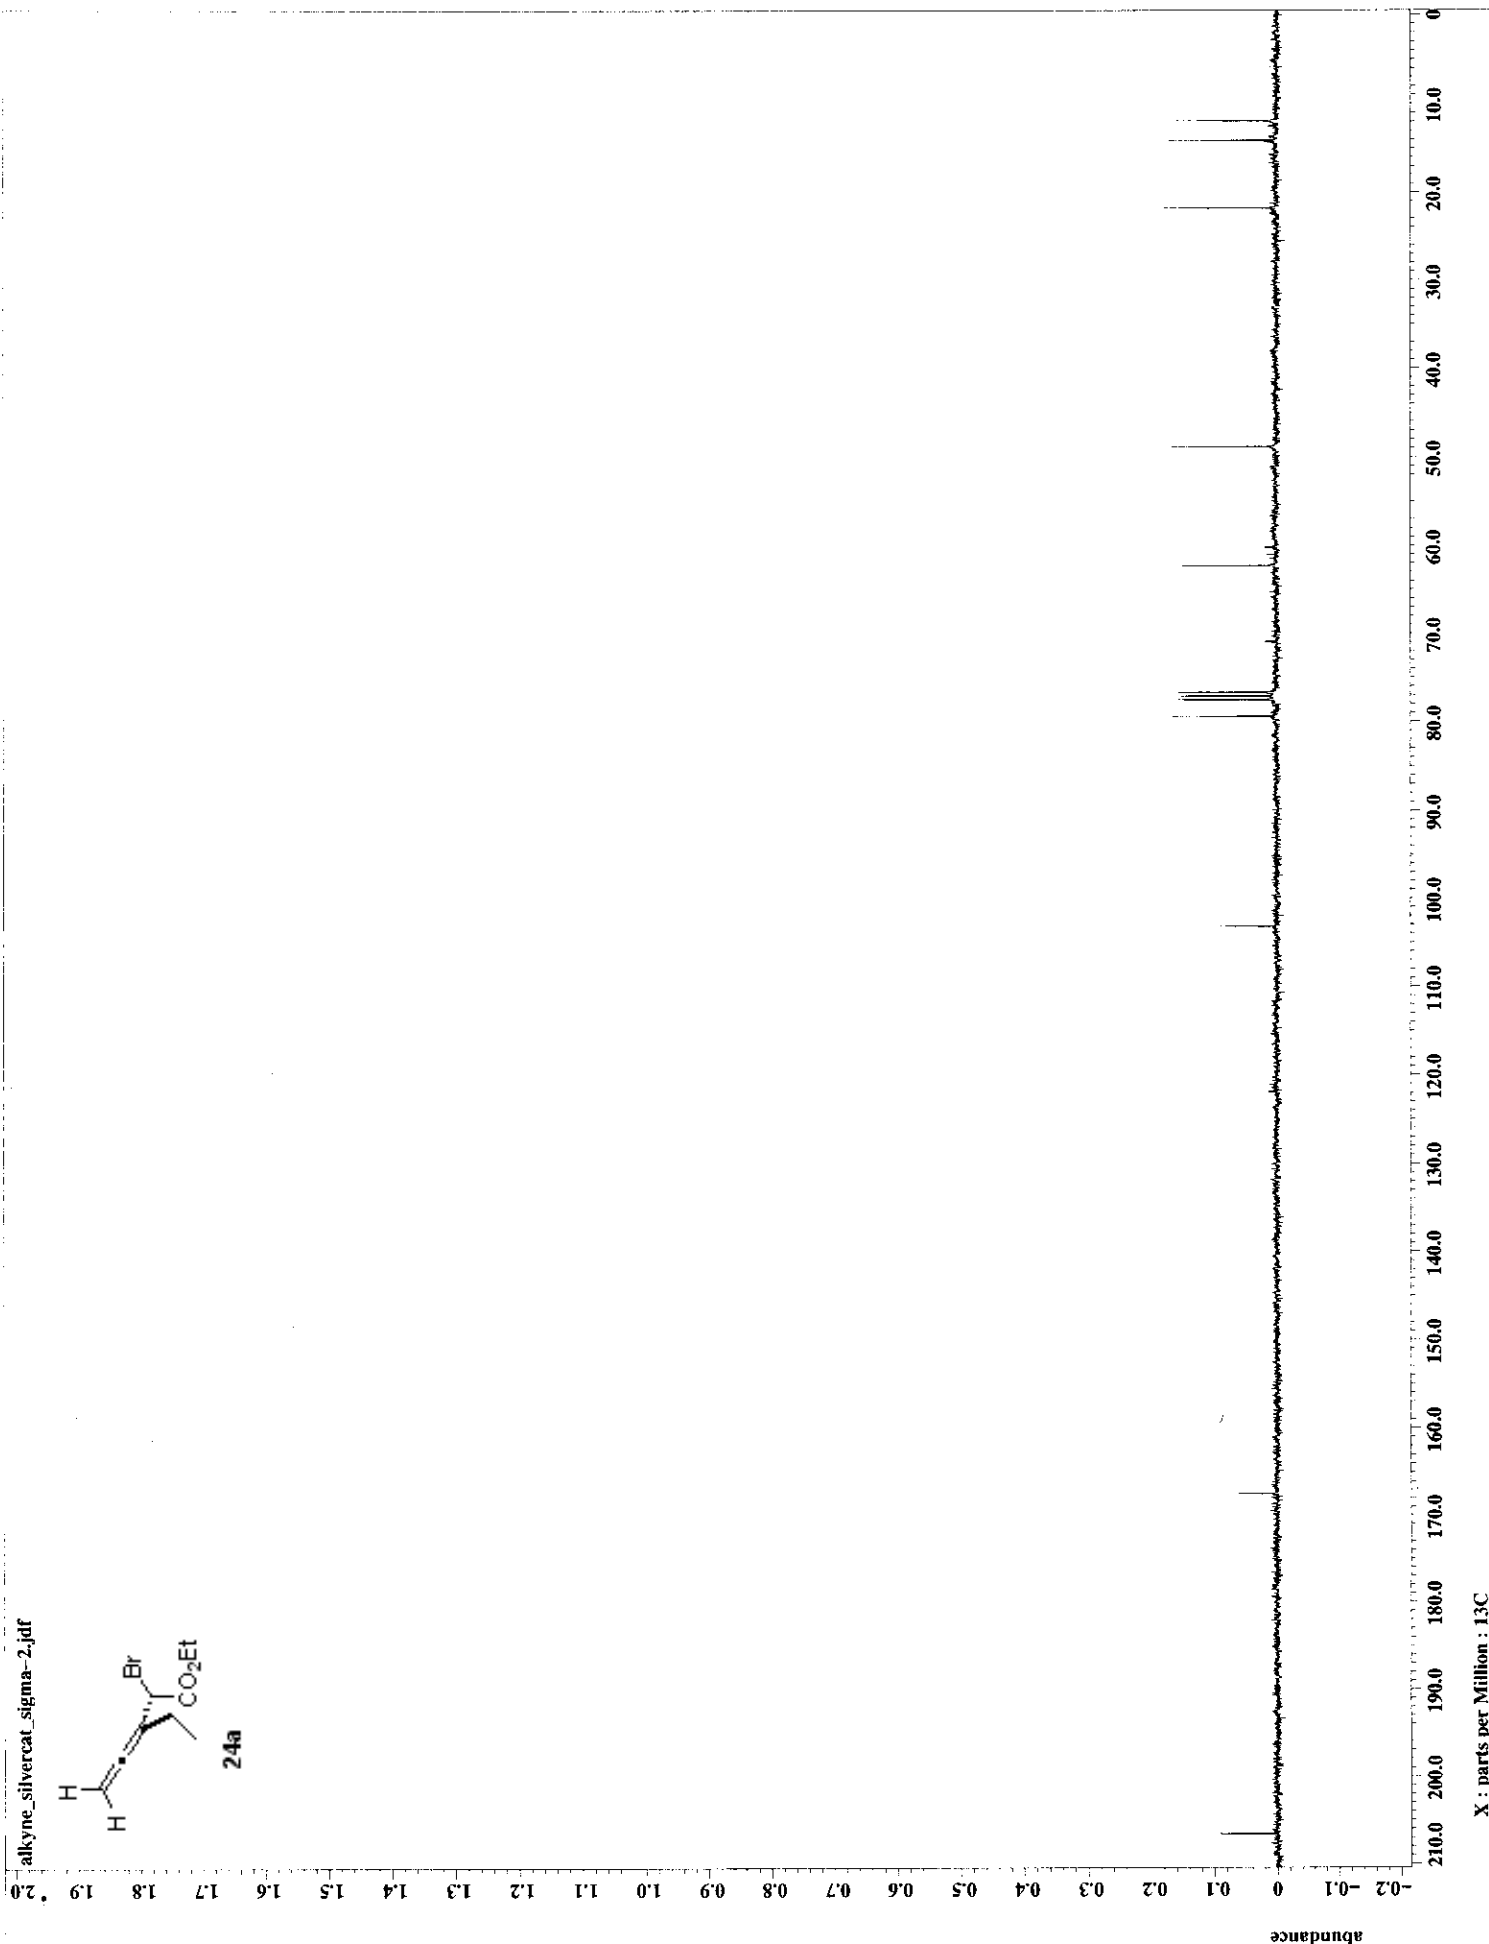

X : parts per Million : 13C

pashu\_jf\_152-3.jdf

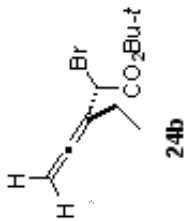

8.17

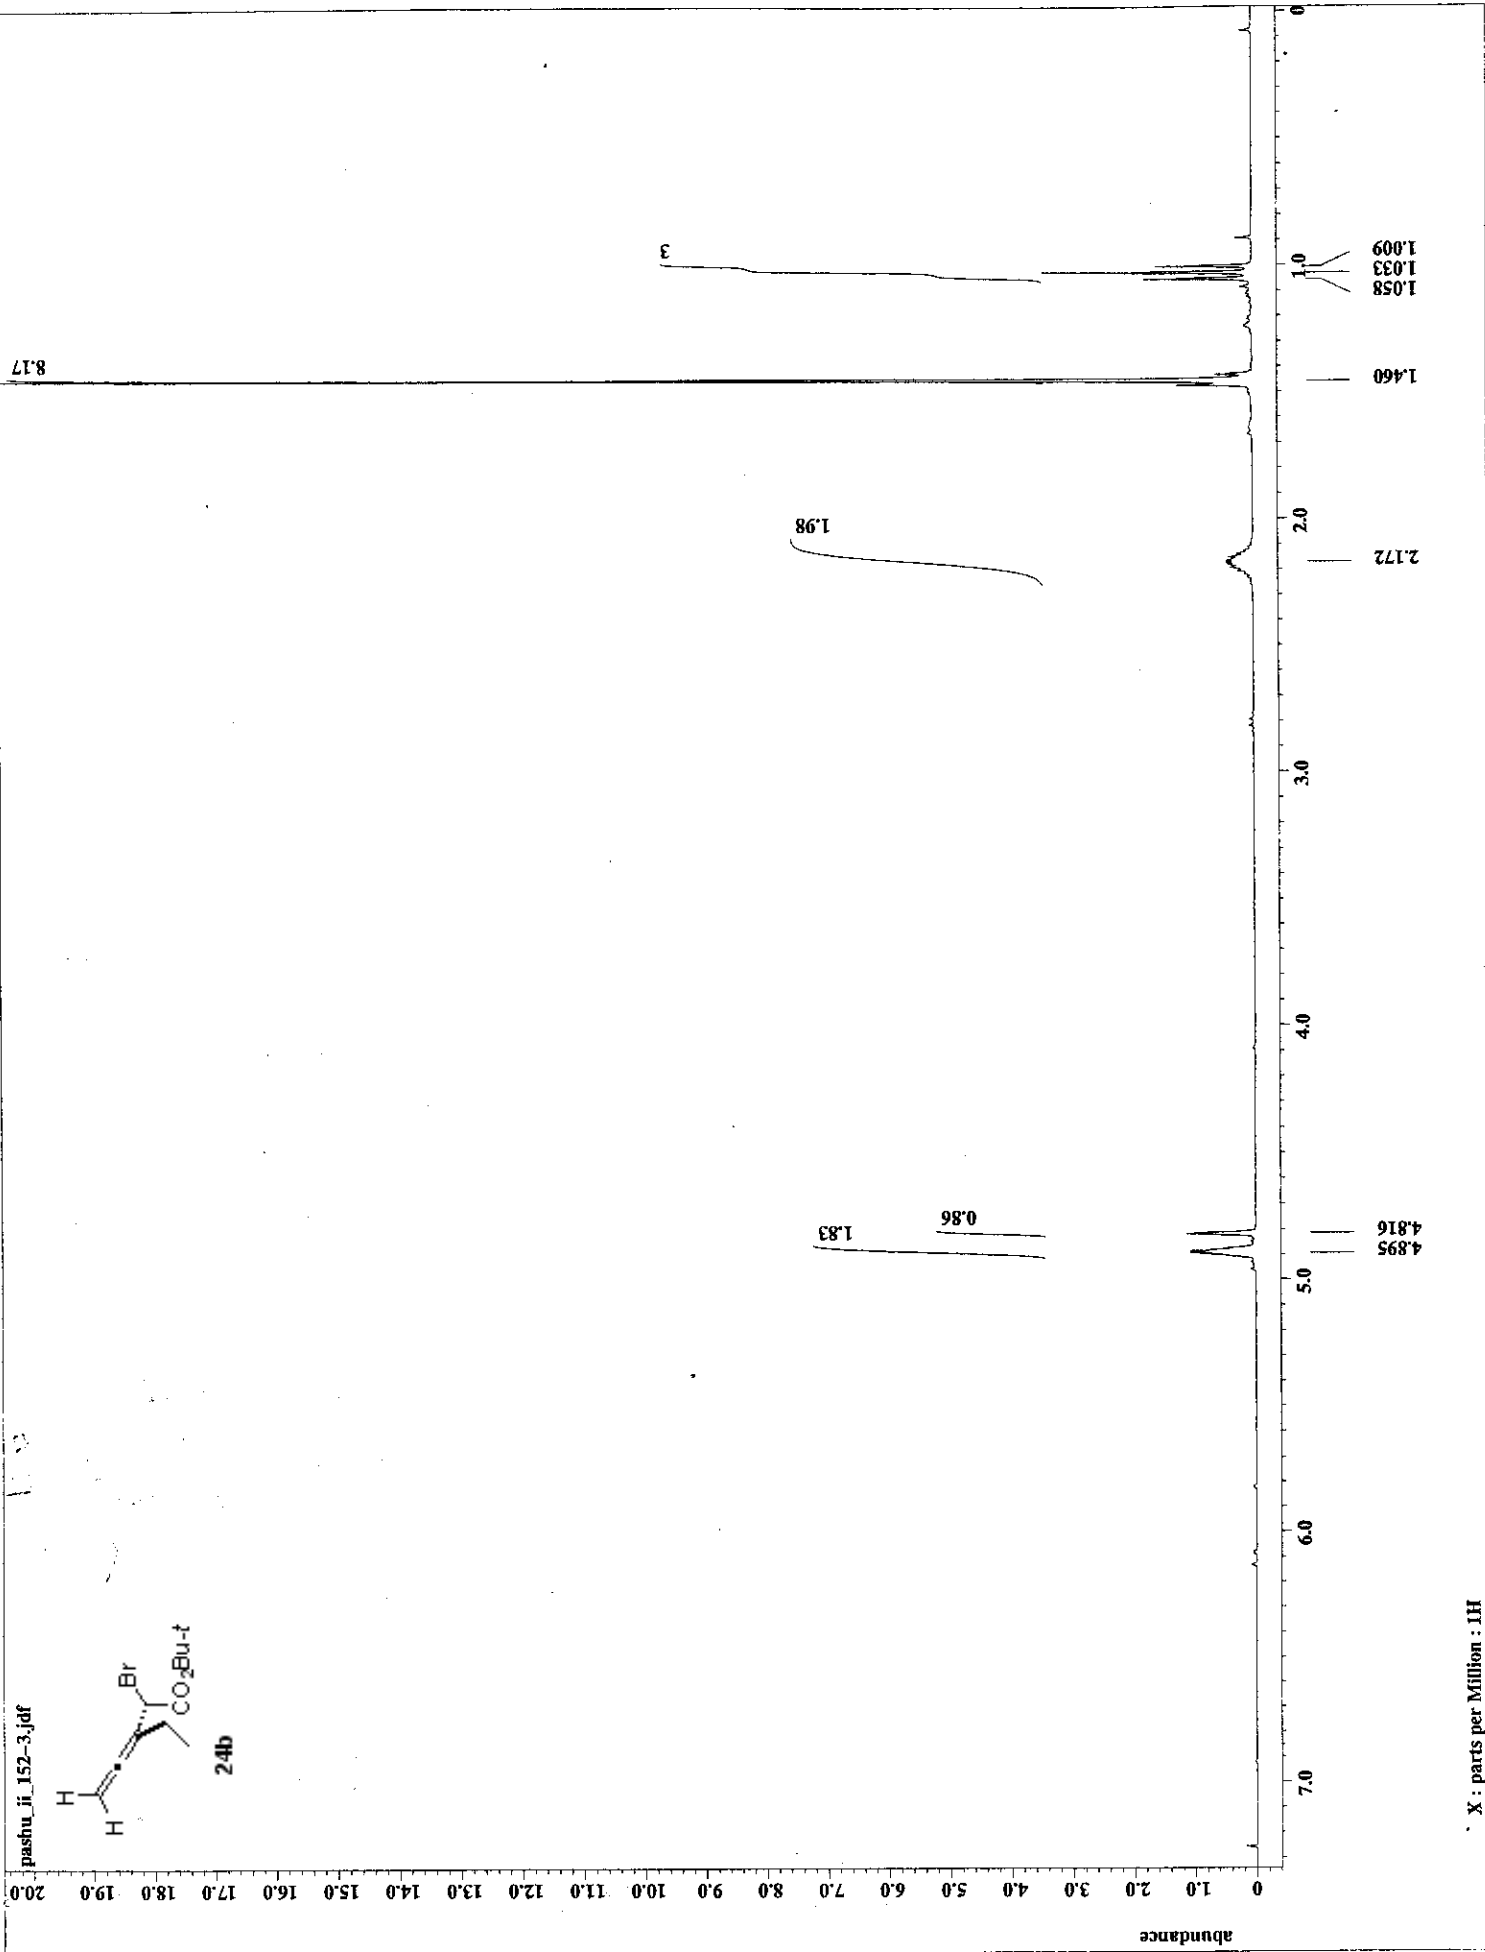

X : parts per Million : 1H

pashu\_ii\_152-3.jdf

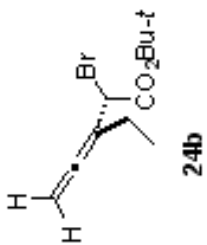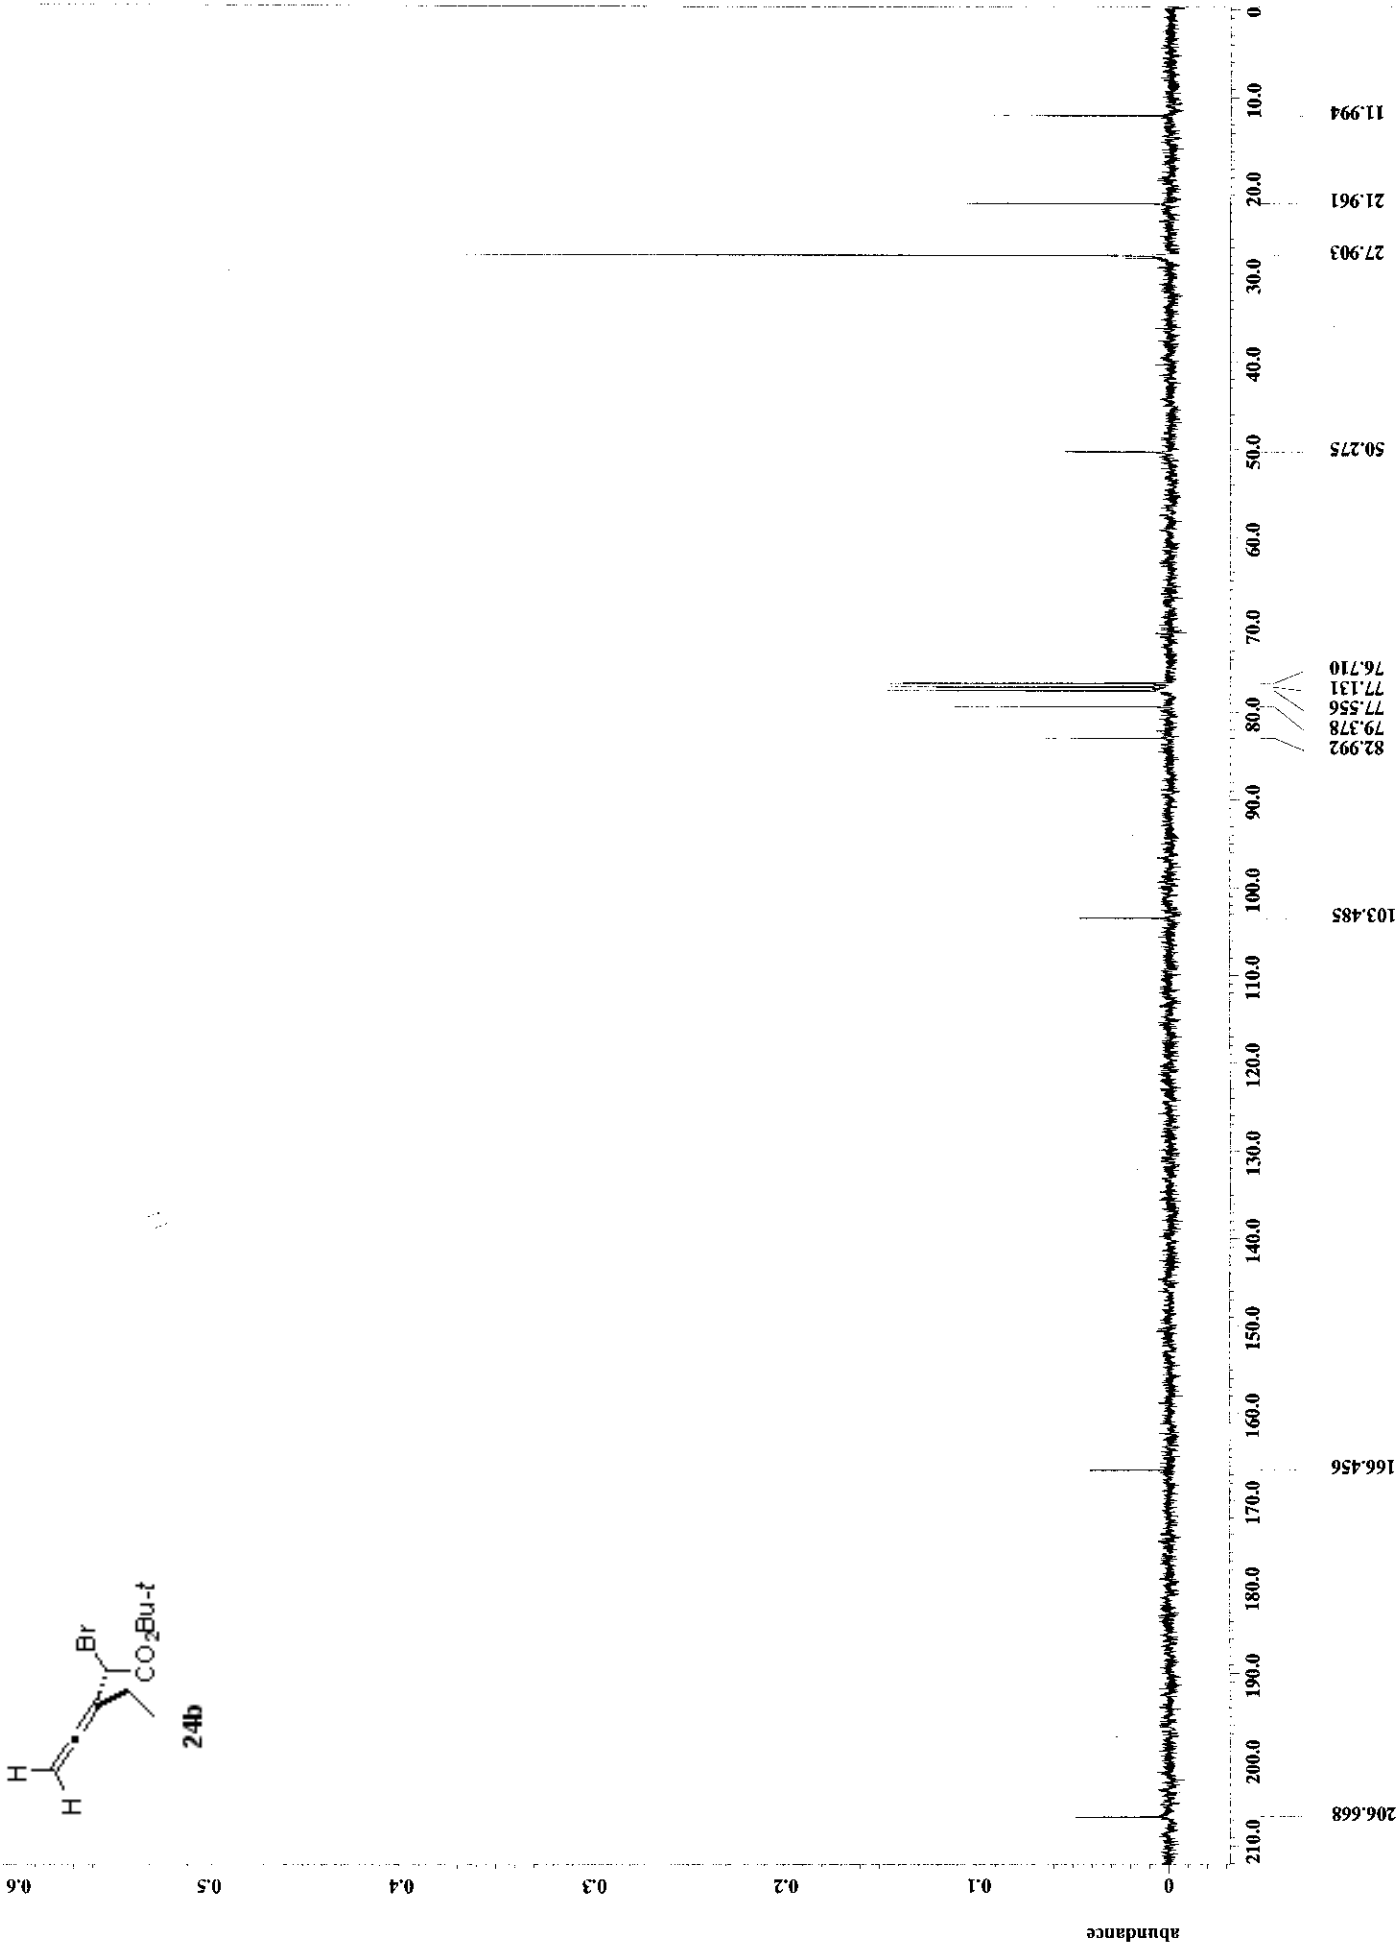

X : parts per Million : 13C

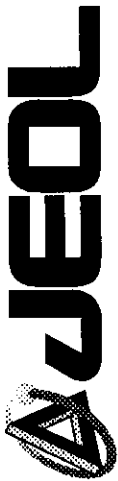

```

Filename = pashu_ii_3 chlorobutene
Author = delta
Experiment = single_pulse.exp
Sample_id = S#335649
Solvent = CHLOROFORM-D
Creation_time = 8-MAY-2006 09:31:52
Revision_time = 8-MAY-2006 12:18:47
Current_time = 8-MAY-2006 12:20:04

Content = Single Pulse Experiment
Data_format = 1D_COMPLEX
Dir_size = 16384
Dir_title = 1H
Dim_units = [ppm]
Dimensions = X
Site = Eclipse+ 500
Spectrometer = DELTA_NMR

Field_strength = 11.7473579 [T] (500 [MH]
X_acq_duration = 2.1823488 [s]
X_domain = 1H
X_freq = 500.15991521 [MHz]
X_offset = 16384
X_points = 0
X_prescans = 0
X_resolution = 0.45822189 [Hz]
X_sweep = 7.50750751 [kHz]
Clipped = FALSE
Mod_return = 1
Scans = 24
Total_scans = 24

X_90_width = 18.5 [us]
X_acq_time = 2.1823488 [s]
X_angle = 45 [deg]
X_pulse = 9.25 [us]
Initial_wait = 1 [s]
Phase_preset = 3 [us]
Recvr_gain = 15
Relaxation_delay = 4 [s]
Temp_get = 25.8 [dC]
Unblank_time = 2 [us]
  
```

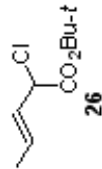

pashu\_ii\_3 chlorobutene\_tbutyldiazoacetate-3.jdf

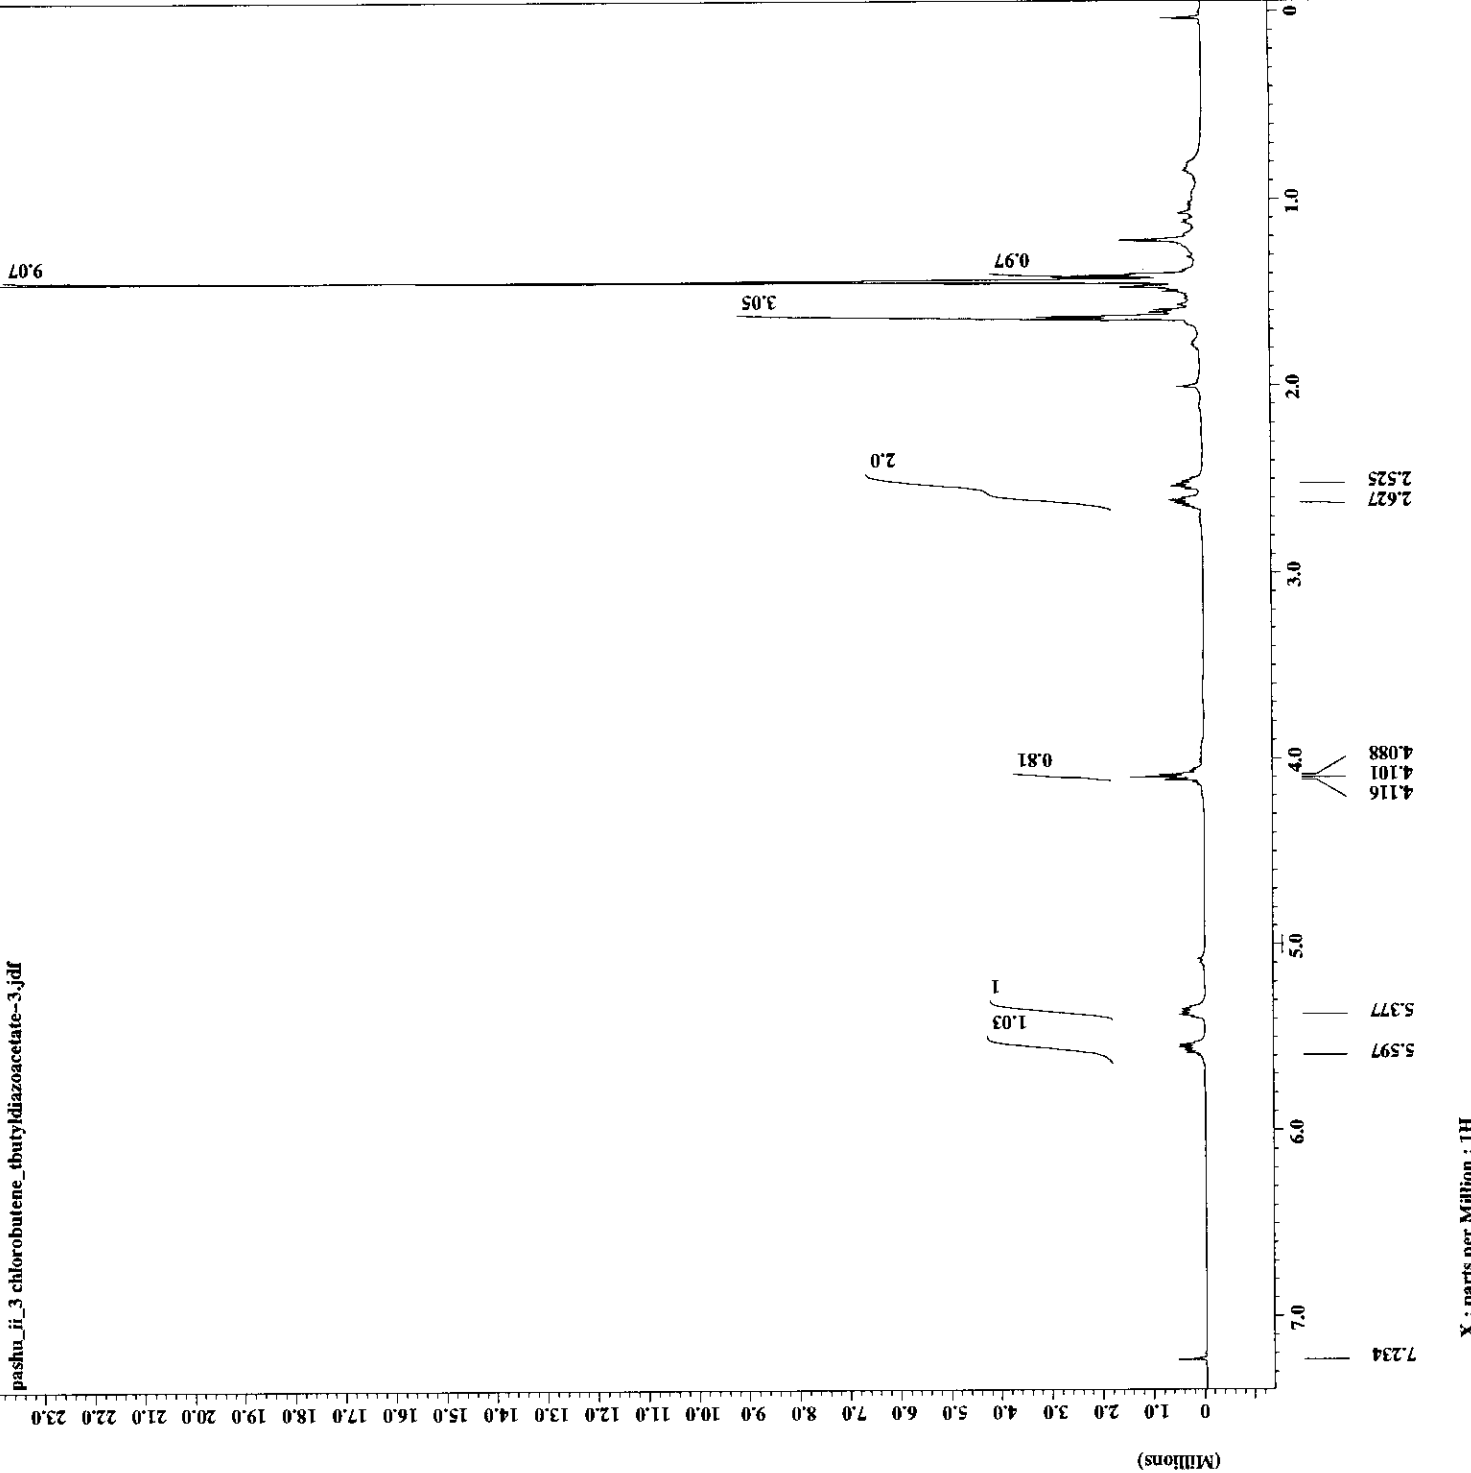

pashu\_ii\_sec chloro\_tbutyl-4.jdf

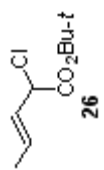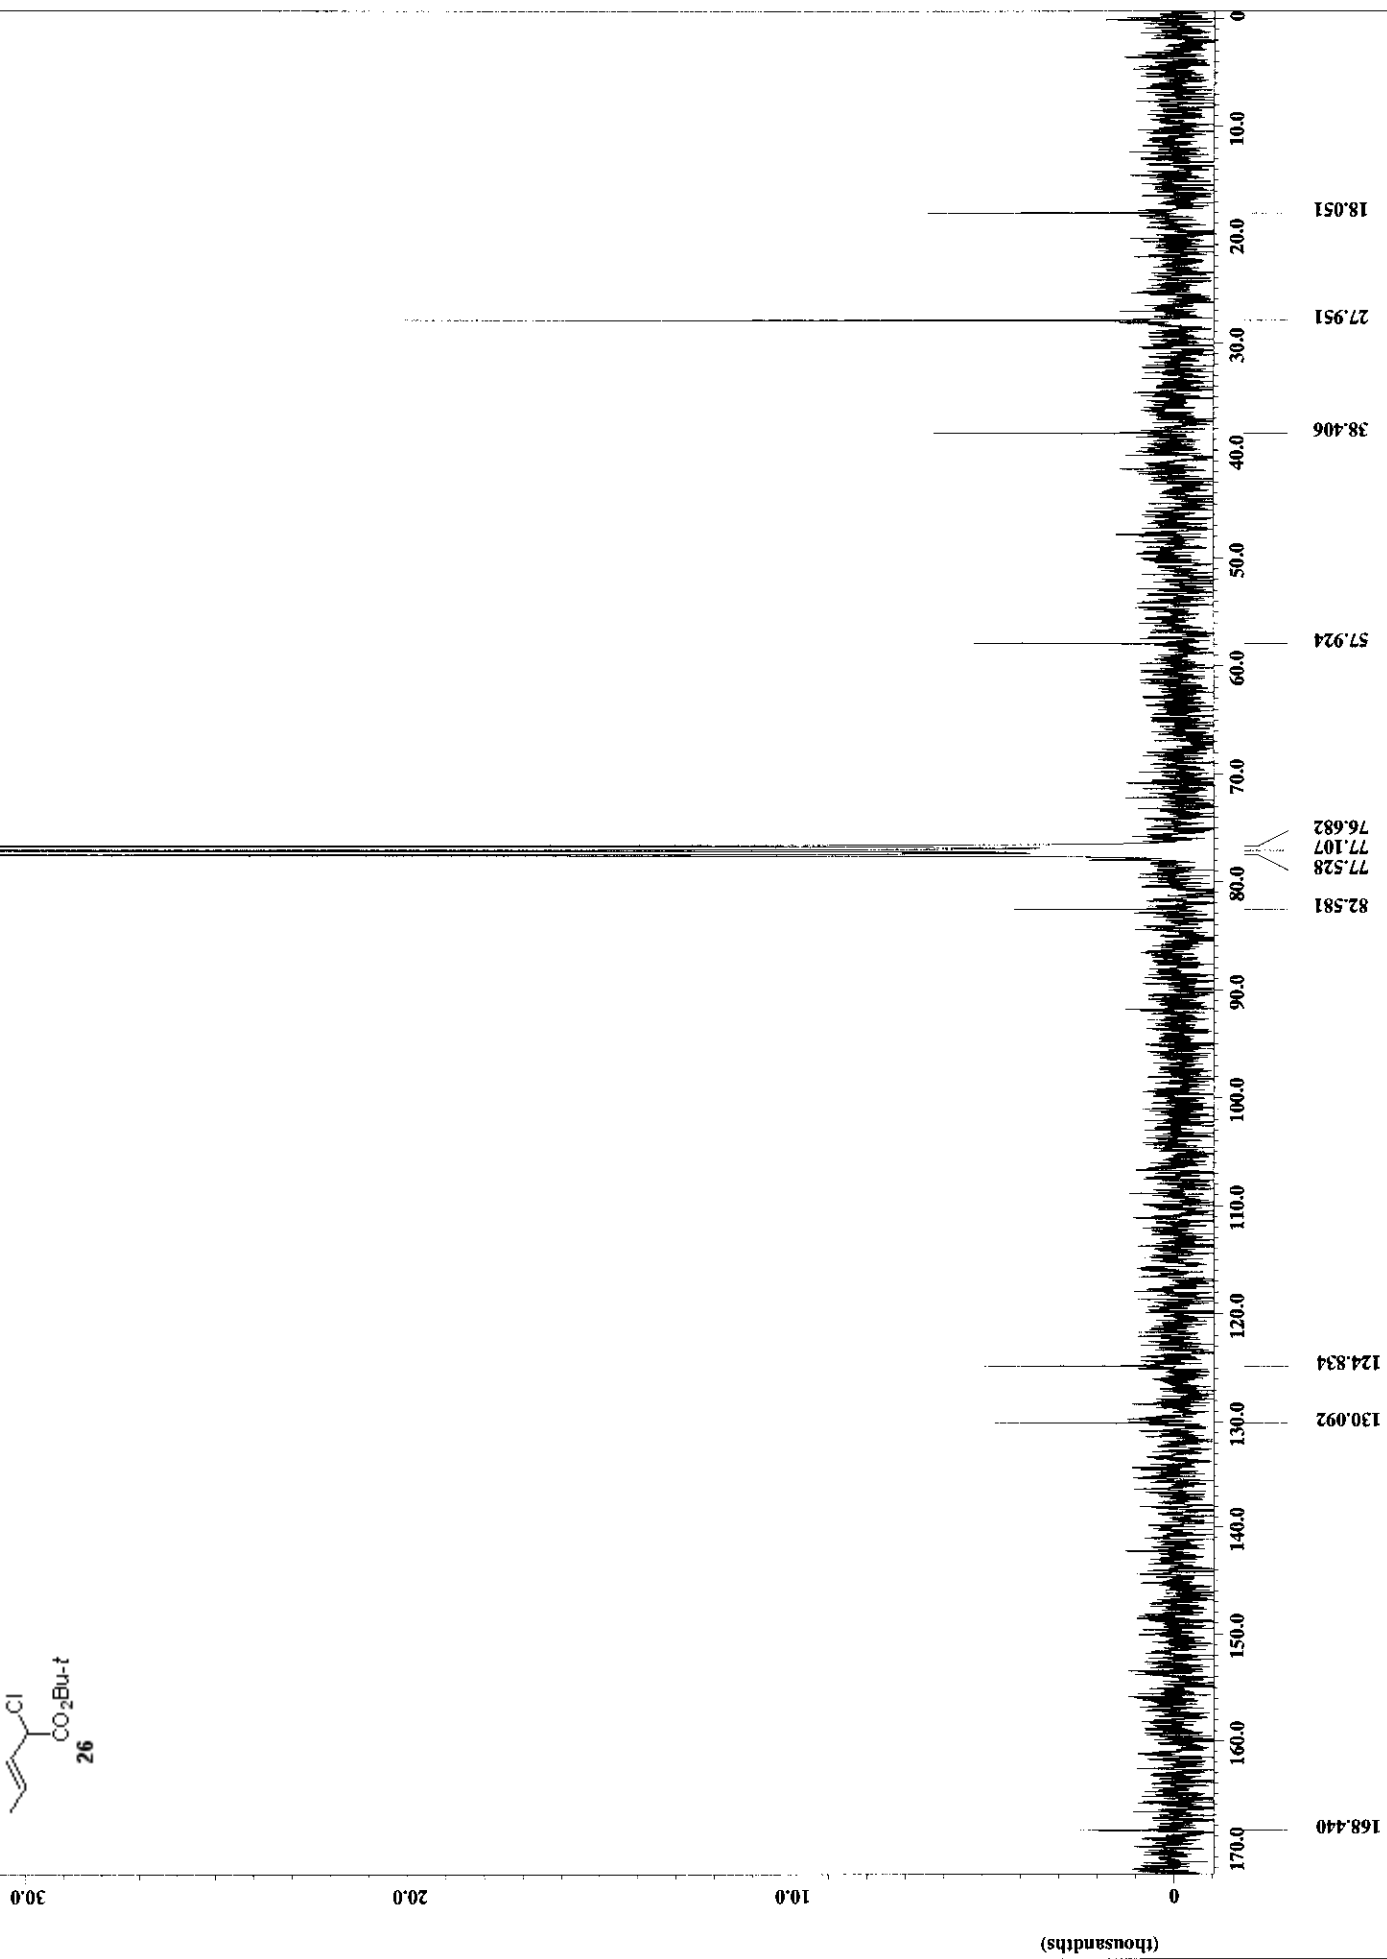

X : parts per Million : 13C
